# Supplementary material for: Accelerated Recruitment of New Brain Development Genes into the Human Genome
Source: PLoS Biol. 2011 Oct 18;9(10):e1001179. doi: 10.1371/journal.pbio.1001179 (PMC3196496; doi:10.1371/journal.pbio.1001179)
Supplement: Table S2 — Statistics of young and old genes with differential expression between different development stages of mouse brain. The top dataset was obtained from fetus and adult cerebral cortex [73] based on SAGE (Serial Analysis of Gene Expression). Analogously, we called differential expression with a generalized likelihood ratio test [67]. Notably, the coverage of genes with SAGE is much lower than that based on RNA-seq due to the much lower sequencing depth of SAGE. The bottom data [74] profiled three postnatal developing time points of the whole brain. Herein, postnatal 0 day samples were classified as the early category, while the other two time points (14 and 56 d) were pooled and classified as the late category. (XLS) [file pbio.1001179.s009.xls]

## Sheet: Table S2
Table S2
	Cerebrum
	Young	Old
Early<Late	4	671
Early>Late	4	649
Fisher's Exact Test P	1
	Whole brain
	Young	Old
Early<Late	27	2620
Early>Late	36	3248
Fisher's Exact Test P	0.8
