# Supplementary material for: Accelerated Recruitment of New Brain Development Genes into the Human Genome
Source: PLoS Biol. 2011 Oct 18;9(10):e1001179. doi: 10.1371/journal.pbio.1001179 (PMC3196496; doi:10.1371/journal.pbio.1001179)
Supplement: Table S3 — Statistics of young and old genes with differential expression between the adult and fetal brain of humans. Differential expression was detected using RNA-seq data, from SRA dataset SRP001199. Only genes with unique Pride [27] peptide evidence were considered. Again, FET was used to test whether old and young genes follow the same distribution. (XLS) [file pbio.1001179.s010.xls]

## Sheet: Table S3
Table S3
	Human
	Young	Old
Adult>Fetus	32	4754
Adult<Fetus	40	2837
Fisher's Exact Test	0.002
