# Supplementary material for: Accelerated Recruitment of New Brain Development Genes into the Human Genome
Source: PLoS Biol. 2011 Oct 18;9(10):e1001179. doi: 10.1371/journal.pbio.1001179 (PMC3196496; doi:10.1371/journal.pbio.1001179)
Supplement: Table S5 — Differential expression analyses based on exon array data. For fetal brain development data [4], we performed two comparisons: neocortex versus non-neocortical regions (striatum, hippocampus, thalamus, and cerebellum), and PFC versus non-neocortical regions. For each class (neocortex, PFC, and non-neocortical regions), the normalized mean expression intensity across different subregions was shown. Then, the FDR follows for the two comparisons. (XLS) [file pbio.1001179.s012.xls]

## Sheet: Table S5
Table S5
Gene	Branch	Neocortex	Non-neocortical regions	PFC	Neocortex vs. Non-neocortical rgions	PFC vs. Non-neocortical rgions
ENSG00000197041	12	9.22315	9.70211	9.18514	1.98695e-14	1.05448e-08
ENSG00000215304	12	6.36914	7.72597	6.72107	9.22164e-14	6.20078e-07
ENSG00000178081	12	6.89281	8.2136	7.23429	9.4821e-13	1.32646e-06
ENSG00000166664	12	6.39944	7.18306	6.50106	2.7627e-12	9.37577e-06
ENSG00000204179	12	4.91986	5.65192	5.02604	5.15616e-12	4.80281e-06
ENSG00000154608	12	9.64828	9.13924	9.62236	1.13196e-11	2.2099e-06
ENSG00000181625	12	7.65614	7.35142	7.65323	1.19424e-09	1.23464e-06
ENSG00000188384	12	7.5799	7.10245	7.502	1.8496e-09	4.23026e-05
ENSG00000126542	12	4.83395	5.753	4.93083	3.29101e-09	5.64852e-05
ENSG00000143429	12	7.07521	7.62807	7.10028	1.07445e-08	2.669e-06
ENSG00000179899	12	9.30736	9.03192	9.30915	1.08359e-08	2.60204e-05
ENSG00000145002	12	6.83631	7.13778	6.95607	1.09913e-08	0.00191661
ENSG00000188792	12	8.05248	7.50175	7.95064	1.80035e-08	2.45586e-05
ENSG00000183748	12	4.34373	4.71015	4.31807	3.82738e-08	6.29703e-05
ENSG00000185020	12	8.64632	7.66771	8.08861	4.51379e-08	0.0187281
ENSG00000185321	12	5.99376	6.55646	5.97871	7.37865e-08	0.000176009
ENSG00000187711	12	8.06265	7.54933	7.97841	7.80533e-08	8.05803e-05
ENSG00000196102	12	6.46077	6.74712	6.47345	1.38166e-07	5.33884e-05
ENSG00000179978	12	8.49759	7.99506	8.58278	1.92343e-07	1.49689e-06
ENSG00000214544	12	8.33581	7.92944	8.3225	4.41194e-07	0.000884047
ENSG00000214589	12	8.2083	7.67474	8.16661	6.06113e-07	0.000152143
ENSG00000182857	12	8.65504	8.39012	8.57287	6.63898e-07	0.00964537
ENSG00000197494	12	8.36668	8.09342	8.26201	1.18159e-06	0.0231552
ENSG00000186523	12	6.87834	7.12773	7.01723	1.23625e-06	0.0624936
ENSG00000188849	12	7.90774	7.59305	7.87437	2.72379e-06	0.00190013
ENSG00000205746	12	9.09378	8.82302	8.99144	3.06205e-06	0.00799412
ENSG00000176276	12	8.17491	8.72546	8.22373	1.29521e-05	0.00443687
ENSG00000182314	12	5.4778	5.1833	5.46505	1.73913e-05	0.00116987
ENSG00000157341	12	9.14866	8.86688	9.19149	1.82714e-05	0.000139755
ENSG00000188801	12	7.26549	7.00311	7.28139	4.3433e-05	0.00215869
ENSG00000185829	12	8.70164	8.39966	8.70182	4.37644e-05	0.000973705
ENSG00000196369	12	11.5663	11.3443	11.4872	4.76953e-05	0.0452624
ENSG00000183889	12	9.64457	9.4075	9.55502	5.09044e-05	0.0490001
ENSG00000188279	12	6.86977	6.54989	6.91348	6.67248e-05	0.000679813
ENSG00000183281	12	5.58999	5.17877	5.56062	7.55805e-05	0.00825437
ENSG00000198161	12	5.59581	5.28653	5.62421	0.000194992	0.00200926
ENSG00000185303	12	6.01142	5.7302	6.00717	0.000215709	0.00615043
ENSG00000215113	12	5.47948	5.12423	5.40233	0.000308477	0.0343311
ENSG00000185984	12	9.92893	9.69707	9.95844	0.000382168	0.00179786
ENSG00000205777	12	5.50495	5.21639	5.49286	0.000390601	0.00945941
ENSG00000170161	12	7.2351	7.04681	7.31691	0.00051762	0.000394215
ENSG00000166157	12	3.90263	3.75186	3.84757	0.000540016	0.131365
ENSG00000168122	12	4.83071	4.52489	4.79395	0.000609766	0.00893149
ENSG00000205717	12	5.63664	5.38167	5.59996	0.000717926	0.0433606
ENSG00000215266	12	4.60037	4.30938	4.51413	0.000723163	0.0924193
ENSG00000174194	12	8.04937	7.87318	8.00286	0.000734235	0.0412504
ENSG00000204836	12	7.43912	7.26437	7.48222	0.000898769	0.00138753
ENSG00000215585	12	6.5792	6.32057	6.60831	0.000965823	0.0075545
ENSG00000184324	12	5.0605	4.80478	5.06827	0.00102101	0.0151809
ENSG00000189295	12	3.25811	2.95296	3.03198	0.00107264	0.462946
ENSG00000165429	12	7.50176	7.29958	7.46168	0.00112821	0.0513548
ENSG00000176826	12	6.54477	6.78932	6.82011	0.00150286	0.747241
ENSG00000186702	12	8.48947	8.30043	8.3903	0.00157232	0.265027
ENSG00000166667	12	5.63897	5.43367	5.61618	0.00169825	0.0387172
ENSG00000205691	12	10.5768	10.4076	10.5943	0.00182288	0.00554448
ENSG00000204775	12	7.93072	7.76097	7.87274	0.00189097	0.127593
ENSG00000203815	12	4.97344	5.31092	4.9661	0.00202397	0.0318475
ENSG00000215604	12	5.21693	4.88315	5.10113	0.00232881	0.101844
ENSG00000157358	12	4.42771	4.14839	4.4214	0.00233883	0.0240666
ENSG00000205583	12	8.699	8.54329	8.68346	0.00261366	0.0607412
ENSG00000212807	12	5.34311	5.07013	5.35674	0.00262985	0.0131567
ENSG00000205454	12	4.65512	4.38793	4.59693	0.0026775	0.0738908
ENSG00000204959	12	5.91334	6.20478	5.95619	0.00273432	0.0905237
ENSG00000204877	12	6.85266	6.58824	6.86038	0.00284463	0.0265066
ENSG00000215340	12	2.96978	2.68177	3.0141	0.00324787	0.0120495
ENSG00000203852	12	7.41247	8.1714	7.62949	0.0032886	0.114606
ENSG00000215478	12	4.79316	4.58134	4.69379	0.00409158	0.21976
ENSG00000183461	12	5.06232	4.87709	5.03991	0.00437214	0.0833786
ENSG00000205864	12	6.94967	6.7283	6.9456	0.00441841	0.0407377
ENSG00000214986	12	6.55263	6.30942	6.56986	0.004479	0.0197129
ENSG00000198946	12	3.90089	3.70729	3.9017	0.00456401	0.0205266
ENSG00000204154	12	5.13987	4.94412	5.12175	0.00457242	0.0505185
ENSG00000203923	12	4.4369	4.14761	4.44714	0.00481432	0.0301089
ENSG00000183706	12	3.59702	3.40757	3.58124	0.00494361	0.0602714
ENSG00000205021	12	6.93509	7.13164	6.93938	0.00547821	0.0427262
ENSG00000215356	12	4.13296	3.8994	4.19928	0.00576371	0.00642317
ENSG00000160828	12	8.44932	8.28895	8.4345	0.00605364	0.0794523
ENSG00000179296	12	8.36891	8.21941	8.32465	0.00609156	0.115302
ENSG00000205215	12	6.0231	5.84183	6.02043	0.00625255	0.0492616
ENSG00000204169	12	7.89118	7.73375	7.84359	0.00628241	0.138085
ENSG00000205217	12	6.62351	6.11974	7.07214	0.00649023	0.000165378
ENSG00000215860	12	4.24166	4.40883	4.27617	0.00719707	0.140354
ENSG00000185751	12	4.32628	4.09756	4.33662	0.00734607	0.0285251
ENSG00000204562	12	4.06162	3.8788	4.02241	0.0076224	0.140775
ENSG00000198035	12	8.42169	8.29605	8.40353	0.00803108	0.100207
ENSG00000174876	12	6.88048	6.67535	6.83005	0.00826094	0.150154
ENSG00000187812	12	7.09657	6.89055	7.0031	0.00835686	0.277764
ENSG00000205847	12	5.11942	4.96933	5.11703	0.0091406	0.0485814
ENSG00000205879	12	6.56507	6.39962	6.59829	0.00945314	0.0239119
ENSG00000213505	12	5.60763	5.4311	5.59906	0.00950384	0.0606545
ENSG00000187172	12	7.48915	7.36037	7.4761	0.00972217	0.0840378
ENSG00000183292	12	5.87074	5.64027	5.89218	0.0110538	0.0285781
ENSG00000182974	12	3.67209	3.46556	3.63718	0.0131462	0.12058
ENSG00000197295	12	7.95721	7.70556	7.88953	0.0136023	0.161562
ENSG00000212802	12	10.0312	9.90321	9.95573	0.0141227	0.490629
ENSG00000174977	12	8.47396	8.25449	8.45647	0.0147475	0.0985838
ENSG00000197421	12	6.25538	6.10688	6.25112	0.0151843	0.0779451
ENSG00000173487	12	3.86399	3.69815	3.87695	0.0153445	0.0523427
ENSG00000214611	12	10.0382	10.1869	10.1462	0.0163076	0.628283
ENSG00000149656	12	5.29094	5.04608	5.21232	0.0170716	0.190172
ENSG00000204119	12	6.21148	6.02932	6.17323	0.0173134	0.184956
ENSG00000197910	12	6.92468	6.74656	6.92233	0.0181671	0.0728616
ENSG00000185926	12	3.76418	3.6062	3.74672	0.0186692	0.0794523
ENSG00000215374	12	7.56153	7.74605	7.49376	0.018806	0.017588
ENSG00000186979	12	7.30352	7.18061	7.23267	0.0207588	0.447593
ENSG00000215513	12	9.51667	9.42016	9.49031	0.0250691	0.26778
ENSG00000215158	12	9.51222	9.30215	9.67481	0.025571	0.00448255
ENSG00000185990	12	8.91192	9.02391	8.87466	0.0259397	0.0463311
ENSG00000214330	12	6.79297	6.61889	6.82301	0.0261561	0.0644055
ENSG00000205536	12	9.34286	9.19343	9.36514	0.0299748	0.031043
ENSG00000215151	12	6.9407	6.81357	6.97795	0.031066	0.0295212
ENSG00000172785	12	7.45939	7.75046	7.42513	0.0315852	0.0906925
ENSG00000183336	12	10.0079	9.89882	10.0253	0.0327021	0.0827351
ENSG00000204375	12	5.22232	5.06018	5.20833	0.0338135	0.173822
ENSG00000198658	12	7.36892	7.4852	7.37969	0.0355807	0.15783
ENSG00000206082	12	7.77951	7.63406	7.74292	0.0360858	0.25915
ENSG00000185176	12	6.45126	6.29713	6.4757	0.0370517	0.0797787
ENSG00000184943	12	6.05723	6.23749	6.04439	0.037497	0.089838
ENSG00000205457	12	5.45667	5.26756	5.4208	0.0375731	0.223162
ENSG00000180598	12	5.35694	5.13934	5.3174	0.0377857	0.195062
ENSG00000185390	12	4.45231	4.62892	4.39753	0.0389496	0.0341612
ENSG00000182242	12	5.24098	5.04805	5.2523	0.0392041	0.10585
ENSG00000171478	12	4.73651	4.53553	4.75698	0.0414796	0.116689
ENSG00000182356	12	6.34754	6.17925	6.39633	0.0437783	0.0681325
ENSG00000206176	12	7.98255	8.1222	7.94796	0.0441013	0.0897276
ENSG00000170356	12	5.63054	5.77965	5.6943	0.0447094	0.415024
ENSG00000106133	12	7.71998	7.62121	7.73093	0.0448735	0.071824
ENSG00000204150	12	7.83955	7.707	7.81559	0.0454524	0.216912
ENSG00000184779	12	10.5661	10.4191	10.509	0.0455805	0.387515
ENSG00000141028	12	5.57675	5.42412	5.5718	0.045801	0.159924
ENSG00000212829	12	3.25097	3.0188	3.23085	0.0480253	0.126285
ENSG00000102080	12	5.30859	5.11123	5.34531	0.0480623	0.0917654
ENSG00000176134	12	6.90581	7.11252	6.75387	0.0492509	0.00825406
ENSG00000126752	12	4.07181	3.95481	4.03553	0.0504033	0.311208
ENSG00000203847	12	5.0247	4.74323	5.09948	0.0506675	0.0643232
ENSG00000169246	12	9.85357	9.72414	9.81484	0.0511566	0.323017
ENSG00000183038	12	6.35209	6.23267	6.32239	0.0513969	0.319268
ENSG00000214845	12	4.64246	4.44739	4.65556	0.0524043	0.127552
ENSG00000100121	12	6.88312	6.75563	6.84152	0.053262	0.366927
ENSG00000072444	12	8.56089	8.44729	8.50729	0.0554924	0.491557
ENSG00000176269	12	4.02162	3.84423	3.96193	0.0571291	0.346745
ENSG00000161103	12	5.6665	5.45309	5.62064	0.0593319	0.27017
ENSG00000204379	12	5.64221	5.49682	5.61455	0.0598647	0.280897
ENSG00000183055	12	6.19222	5.92652	6.11334	0.0647811	0.37068
ENSG00000170590	12	4.80401	4.61651	4.69763	0.0657543	0.563711
ENSG00000205236	12	9.28144	9.44313	9.29047	0.0695653	0.203112
ENSG00000177693	12	3.65567	3.49884	3.66372	0.0715857	0.185228
ENSG00000184115	12	5.4377	5.31047	5.38176	0.073085	0.441314
ENSG00000205989	12	5.34461	5.17635	5.30923	0.0755503	0.265851
ENSG00000205018	12	6.02514	5.88273	5.98315	0.0782896	0.363341
ENSG00000205456	12	5.55359	5.34367	5.56566	0.0783809	0.170739
ENSG00000213499	12	5.58018	5.4542	5.55256	0.0806776	0.342819
ENSG00000197443	12	5.13989	5.03066	5.13694	0.0884233	0.235701
ENSG00000205584	12	5.48777	5.33293	5.49679	0.0885335	0.210357
ENSG00000170298	12	6.29774	6.39493	6.28731	0.0897065	0.152105
ENSG00000205976	12	5.75876	5.63004	5.78346	0.0900413	0.150215
ENSG00000175509	12	6.11551	5.94899	6.12964	0.0967926	0.185133
ENSG00000184961	12	7.08396	6.97715	6.97544	0.10022	0.985504
ENSG00000204745	12	7.78937	7.71716	7.80892	0.104744	0.117561
ENSG00000170122	12	5.82254	5.91685	5.80258	0.110235	0.173942
ENSG00000189393	12	6.10292	5.97342	6.10018	0.113744	0.251672
ENSG00000215561	12	3.87918	4.09042	3.73821	0.114373	0.0321237
ENSG00000184879	12	7.70851	7.58226	7.70443	0.116933	0.263642
ENSG00000206023	12	6.32508	6.19122	6.31721	0.120015	0.288212
ENSG00000175302	12	2.41673	2.54279	2.37535	0.121275	0.0913783
ENSG00000213052	12	5.82685	5.71052	5.80459	0.125621	0.375558
ENSG00000205292	12	3.66578	3.55054	3.71161	0.137909	0.139356
ENSG00000136698	12	6.1639	6.2741	6.17637	0.13863	0.361749
ENSG00000168992	12	5.61224	5.4983	5.63646	0.142808	0.195597
ENSG00000203902	12	7.17958	7.2732	7.10837	0.148536	0.0491966
ENSG00000204382	12	5.6693	5.5469	5.64813	0.149913	0.420685
ENSG00000197592	12	3.29562	3.20562	3.28651	0.151457	0.328441
ENSG00000186715	12	6.51676	6.42776	6.48868	0.153633	0.481199
ENSG00000184906	12	6.99089	7.09205	6.9151	0.154071	0.0572812
ENSG00000204495	12	4.08976	3.97332	4.115	0.160285	0.220343
ENSG00000205572	12	7.58234	7.68806	7.53618	0.162235	0.16183
ENSG00000186445	12	4.33847	4.20746	4.28454	0.16769	0.561878
ENSG00000205315	12	4.80203	4.60559	4.62808	0.178908	0.920749
ENSG00000185775	12	5.17328	5.05238	5.1597	0.179782	0.40483
ENSG00000182824	12	4.16115	4.03818	4.12507	0.184277	0.470177
ENSG00000184659	12	6.43239	6.53538	6.37109	0.186787	0.129731
ENSG00000186124	12	3.33414	3.2078	3.29345	0.193545	0.478879
ENSG00000215111	12	4.10392	3.94215	4.16621	0.20422	0.21517
ENSG00000204164	12	8.13118	8.05777	8.15721	0.205889	0.202741
ENSG00000206077	12	6.83277	6.73694	6.83037	0.212439	0.334048
ENSG00000150175	12	6.05602	6.31995	5.94853	0.215298	0.246453
ENSG00000203926	12	4.66318	4.55728	4.69693	0.216757	0.266047
ENSG00000187761	12	3.2977	3.20285	3.26501	0.217296	0.556762
ENSG00000204253	12	10.1786	10.0677	10.1588	0.219691	0.444241
ENSG00000139239	12	10.6205	10.5353	10.5726	0.228862	0.723867
ENSG00000213214	12	4.7301	4.82523	4.73647	0.234454	0.486501
ENSG00000215366	12	5.9857	5.8642	5.98779	0.235978	0.375122
ENSG00000215352	12	6.2843	6.17521	6.28255	0.249581	0.426062
ENSG00000123447	12	3.28093	3.17389	3.27529	0.260758	0.41195
ENSG00000198014	12	11.06	10.9297	11.1982	0.261688	0.0992279
ENSG00000137970	12	9.39733	9.26257	9.35326	0.26908	0.618154
ENSG00000196347	12	6.25954	6.18184	6.25815	0.269926	0.432612
ENSG00000213826	12	6.71266	6.57562	6.78898	0.270585	0.19433
ENSG00000186301	12	6.42288	6.34698	6.37507	0.272431	0.779207
ENSG00000212753	12	5.9607	5.87235	5.96521	0.290656	0.455897
ENSG00000176681	12	7.53896	7.60456	7.5499	0.309523	0.50859
ENSG00000180581	12	10.2604	10.3423	10.2319	0.328633	0.362624
ENSG00000183791	12	5.68159	5.60012	5.69384	0.334105	0.406019
ENSG00000188740	12	4.93876	4.86654	4.91657	0.357774	0.642679
ENSG00000174028	12	9.79962	9.88216	9.72836	0.363244	0.257292
ENSG00000214329	12	3.94246	3.88848	3.96247	0.36332	0.366439
ENSG00000204918	12	4.82256	4.74858	4.83426	0.366993	0.448284
ENSG00000146707	12	7.26412	7.20576	7.28801	0.378269	0.33346
ENSG00000140181	12	9.8805	9.82308	9.91988	0.381225	0.238693
ENSG00000205233	12	7.0389	6.94418	7.00279	0.38259	0.68877
ENSG00000159860	12	6.83221	6.768	6.91483	0.386154	0.129506
ENSG00000212757	12	6.0535	6.13102	6.01617	0.388136	0.317333
ENSG00000214485	12	9.92123	9.81309	9.83644	0.388415	0.900641
ENSG00000215914	12	7.42466	7.36219	7.44295	0.393297	0.437784
ENSG00000159123	12	6.45443	6.40008	6.50069	0.398893	0.20538
ENSG00000215365	12	6.4957	6.42544	6.47997	0.402809	0.656729
ENSG00000144158	12	7.34291	7.28018	7.29288	0.407111	0.91562
ENSG00000215252	12	8.02623	8.10741	7.94693	0.41983	0.178166
ENSG00000212756	12	6.11378	6.04416	6.10644	0.421083	0.636529
ENSG00000198637	12	9.49619	9.58324	9.40484	0.439802	0.263938
ENSG00000214668	12	7.58269	7.53914	7.50512	0.439868	0.649297
ENSG00000170389	12	5.83565	5.7208	5.57599	0.443855	0.445924
ENSG00000212994	12	7.24426	7.14963	7.27543	0.448817	0.435478
ENSG00000184795	12	7.99115	8.05456	8.02547	0.451292	0.830343
ENSG00000205020	12	4.6318	4.70469	4.6746	0.452975	0.827517
ENSG00000204848	12	6.0019	5.94992	6.02249	0.457058	0.43185
ENSG00000214116	12	9.02886	8.88621	9.00746	0.464198	0.658599
ENSG00000189152	12	6.06815	5.99845	6.01175	0.466069	0.917443
ENSG00000215373	12	6.30646	6.24315	6.29634	0.469864	0.676056
ENSG00000176115	12	5.60753	5.65799	5.54754	0.47363	0.246885
ENSG00000185485	12	9.09054	9.04653	9.06989	0.496148	0.798328
ENSG00000212758	12	5.9821	5.92622	5.95082	0.501432	0.837623
ENSG00000204450	12	3.53136	3.4842	3.5089	0.502447	0.808656
ENSG00000215567	12	5.08157	5.0327	5.0099	0.504961	0.819029
ENSG00000196644	12	7.20478	7.2735	7.21922	0.513983	0.716522
ENSG00000203946	12	3.91792	3.86942	3.90454	0.523815	0.717952
ENSG00000215190	12	7.41676	7.45271	7.43129	0.545044	0.803194
ENSG00000178660	12	7.68907	7.74682	7.60213	0.548043	0.284283
ENSG00000180658	12	4.01847	4.07556	4.0486	0.550701	0.863221
ENSG00000196993	12	8.69733	8.6532	8.67447	0.554007	0.841232
ENSG00000170089	12	8.4765	8.51706	8.44114	0.598677	0.481909
ENSG00000133433	12	6.25538	6.32482	5.99363	0.60453	0.0464977
ENSG00000170074	12	6.03574	5.99918	5.93458	0.625316	0.50014
ENSG00000182484	12	8.14183	8.11788	8.08839	0.62759	0.635282
ENSG00000182217	12	7.4928	7.55253	7.68635	0.629042	0.43964
ENSG00000212759	12	5.91555	5.95333	5.88859	0.661617	0.562375
ENSG00000196622	12	6.56407	6.59708	6.50272	0.665566	0.403331
ENSG00000175658	12	6.28397	6.31473	6.33407	0.675696	0.863074
ENSG00000203929	12	3.48456	3.44686	3.4309	0.692666	0.903641
ENSG00000184319	12	8.06764	8.08819	8.08008	0.72807	0.924203
ENSG00000181997	12	5.36645	5.39279	5.36818	0.745853	0.823475
ENSG00000165178	12	6.21168	6.18554	6.22954	0.769664	0.726042
ENSG00000128692	12	7.00713	7.03093	6.95603	0.779341	0.492761
ENSG00000181404	12	8.35777	8.34383	8.30733	0.783179	0.578916
ENSG00000205578	12	7.31024	7.28505	7.22664	0.789988	0.640977
ENSG00000197008	12	7.02486	6.99907	7.03342	0.794174	0.791428
ENSG00000146556	12	8.26071	8.27421	8.18567	0.803951	0.174775
ENSG00000214660	12	7.97807	7.96386	7.8957	0.809185	0.34297
ENSG00000183298	12	9.95967	9.93254	9.98255	0.809185	0.756465
ENSG00000204699	12	4.90866	4.93188	4.90648	0.810499	0.834748
ENSG00000153684	12	5.46253	5.45064	5.43458	0.819309	0.807651
ENSG00000187786	12	6.99637	6.96547	6.99116	0.822281	0.892809
ENSG00000180015	12	8.56983	8.59357	8.60411	0.830615	0.946266
ENSG00000174196	12	7.36656	7.37865	7.40496	0.855862	0.782708
ENSG00000117262	12	7.67343	7.69212	7.70783	0.859315	0.913842
ENSG00000186466	12	5.63459	5.62228	5.61426	0.882237	0.943881
ENSG00000205094	12	7.23398	7.21985	7.26255	0.888766	0.765183
ENSG00000153165	12	8.64695	8.63594	8.67102	0.890903	0.748949
ENSG00000186060	12	7.49316	7.48697	7.47014	0.89246	0.809145
ENSG00000173827	12	3.84551	3.8686	3.93049	0.89754	0.795855
ENSG00000169664	12	7.19655	7.18648	7.21159	0.903754	0.833495
ENSG00000182646	12	7.96838	7.96035	7.91995	0.909209	0.656023
ENSG00000173213	12	6.39725	6.4041	6.40596	0.911706	0.983496
ENSG00000205571	12	7.14736	7.13935	7.15042	0.917439	0.919155
ENSG00000215544	12	8.31482	8.31064	8.26805	0.955488	0.675864
ENSG00000204449	12	3.61371	3.60631	3.52071	0.957751	0.573663
ENSG00000215112	12	6.35848	6.36407	6.30533	0.959771	0.665525
ENSG00000183127	12	3.34854	3.35253	3.37998	0.97181	0.850974
ENSG00000184538	12	9.59443	9.59124	9.62903	0.97317	0.769797
ENSG00000205034	12	3.68969	3.69015	3.68382	0.995466	0.955729
ENSG00000168379	11	5.05067	6.19723	5.02051	7.94115e-25	7.67987e-14
ENSG00000204525	11	6.94399	7.52559	6.97638	1.00185e-16	1.26707e-08
ENSG00000186076	11	8.82292	9.33314	8.77295	1.47553e-14	1.86482e-09
ENSG00000171116	11	6.74689	6.21366	6.68011	1.14477e-13	7.75259e-07
ENSG00000205408	11	9.93186	9.63751	10.0117	1.68519e-08	4.69117e-07
ENSG00000100181	11	6.26374	5.96795	6.19814	2.89008e-08	0.00111488
ENSG00000182783	11	3.8426	3.2845	3.83567	4.55552e-08	1.94269e-05
ENSG00000106714	11	8.67965	7.73422	8.12433	5.08402e-08	0.0239376
ENSG00000215575	11	5.87588	5.52569	5.8661	5.32498e-08	0.000102451
ENSG00000205273	11	7.95885	7.4539	7.86192	8.38873e-08	0.000103581
ENSG00000172014	11	5.8591	6.69303	5.63286	1.04452e-07	5.68226e-08
ENSG00000183148	11	6.48174	7.10444	6.31378	1.23281e-07	5.15529e-08
ENSG00000196275	11	8.38877	7.97673	8.36642	4.9307e-07	0.00101414
ENSG00000170906	11	8.26535	8.68937	8.28296	5.1355e-07	0.000346826
ENSG00000204622	11	8.3718	8.86895	8.39358	6.14943e-07	0.000384707
ENSG00000183444	11	8.03288	7.76132	8.01714	7.17639e-07	0.000331218
ENSG00000183458	11	9.35851	9.0855	9.25851	8.40637e-07	0.00529488
ENSG00000172533	11	8.41975	8.16875	8.50971	9.0283e-07	8.99231e-08
ENSG00000183793	11	9.26096	8.98667	9.15874	9.25826e-07	0.00435794
ENSG00000182053	11	4.31527	4.89153	4.34786	1.42551e-06	0.00380586
ENSG00000100068	11	6.56389	6.2925	6.52275	2.06595e-06	0.00465498
ENSG00000159712	11	5.14808	5.6116	4.91604	2.99336e-06	1.66943e-07
ENSG00000106526	11	6.62932	6.303	6.65146	3.43264e-06	0.000763386
ENSG00000184055	11	5.73339	5.44428	5.72162	8.39479e-06	0.000332998
ENSG00000214558	11	7.53794	7.33448	7.5888	9.47997e-06	6.61045e-05
ENSG00000182368	11	7.83044	7.54339	7.71774	1.1354e-05	0.032947
ENSG00000185710	11	9.21977	8.92454	9.24249	1.44916e-05	0.000358192
ENSG00000125551	11	5.51622	5.0745	5.49659	2.58113e-05	0.00364552
ENSG00000198106	11	6.75696	6.57298	6.76144	4.21689e-05	0.00150813
ENSG00000214915	11	5.76016	5.38659	5.69144	5.22453e-05	0.0142571
ENSG00000205029	11	3.68371	3.39178	3.67503	5.2753e-05	0.00623698
ENSG00000156363	11	7.50089	7.22394	7.39844	5.68263e-05	0.047207
ENSG00000204533	11	6.49247	6.16078	6.51136	7.23227e-05	0.0011848
ENSG00000188626	11	5.47493	5.75538	5.53846	7.60453e-05	0.022183
ENSG00000184303	11	5.73228	6.07249	5.80025	0.000103287	0.0186234
ENSG00000158483	11	6.43832	6.61119	6.47348	0.000113927	0.0187158
ENSG00000152117	11	7.58438	7.38372	7.55965	0.00012045	0.0112664
ENSG00000215269	11	5.94634	5.57705	5.90639	0.000129763	0.00466694
ENSG00000186322	11	7.72378	7.45796	7.61721	0.000172927	0.0783734
ENSG00000163040	11	6.24398	6.52146	6.20515	0.000210703	0.00323485
ENSG00000186113	11	3.42975	3.1662	3.42626	0.000223295	0.00337639
ENSG00000198750	11	9.60217	9.37087	9.45148	0.000267003	0.29354
ENSG00000158482	11	6.39584	6.1178	6.50232	0.000278449	0.000105779
ENSG00000169659	11	4.37355	4.11602	4.31601	0.000282157	0.0189145
ENSG00000099251	11	6.49235	6.22424	6.53711	0.000296814	0.000797015
ENSG00000188199	11	7.30757	7.06626	7.26377	0.000301854	0.0239376
ENSG00000215153	11	6.90714	6.72217	6.84342	0.000353217	0.061658
ENSG00000181718	11	3.95069	3.6582	3.87992	0.000378623	0.0378515
ENSG00000204794	11	5.00273	5.22125	5.0199	0.000431981	0.0306791
ENSG00000171483	11	4.70316	4.46029	4.71019	0.00050667	0.0104322
ENSG00000177243	11	5.02555	4.76592	5.02542	0.000581534	0.00853364
ENSG00000122854	11	5.68506	5.44306	5.6502	0.000584544	0.0267137
ENSG00000164729	11	6.18831	5.90438	6.18573	0.000726812	0.0109111
ENSG00000205534	11	10.1489	9.95049	10.15	0.000743018	0.0135088
ENSG00000196696	11	7.98058	7.82086	8.05698	0.000784586	7.30509e-05
ENSG00000168255	11	8.99142	9.22032	8.98917	0.00082686	0.0162802
ENSG00000206140	11	7.72179	7.92521	7.6807	0.00092508	0.00832616
ENSG00000205152	11	10.185	10.0132	10.2157	0.00129015	0.00159345
ENSG00000185978	11	5.94811	5.67004	5.93713	0.00136523	0.0293011
ENSG00000181837	11	4.14759	3.87785	4.13799	0.00137772	0.0254664
ENSG00000198496	11	6.56105	6.77287	6.62166	0.00172151	0.0844937
ENSG00000185701	11	4.0742	3.78777	4.04606	0.00184146	0.0289446
ENSG00000185164	11	9.53627	9.76205	9.58551	0.00207995	0.116566
ENSG00000103512	11	9.55306	9.78288	9.6036	0.00218871	0.121352
ENSG00000184478	11	5.65445	5.37559	5.65148	0.00221175	0.0311737
ENSG00000177201	11	6.74792	6.46736	6.81324	0.00225726	0.00426219
ENSG00000214856	11	6.10211	5.89543	6.10631	0.00228624	0.0185675
ENSG00000198555	11	7.09515	7.23365	7.08252	0.00231474	0.019492
ENSG00000186232	11	5.56367	5.25567	5.51065	0.0024275	0.0547122
ENSG00000214617	11	7.20218	7.34389	7.1863	0.00250635	0.0192349
ENSG00000197927	11	7.4977	7.30329	7.43937	0.00285346	0.147177
ENSG00000196312	11	9.91678	10.0639	9.94715	0.00303905	0.092687
ENSG00000212664	11	12.167	11.9289	12.1239	0.0030686	0.0727618
ENSG00000215302	11	5.11396	5.38766	5.10919	0.00306867	0.0182077
ENSG00000215817	11	7.81591	7.6562	7.87692	0.00310261	0.00330167
ENSG00000188403	11	4.85831	4.48981	4.83084	0.0031264	0.0345946
ENSG00000198445	11	6.15419	5.90728	6.18304	0.00331038	0.0160471
ENSG00000215492	11	10.7231	10.534	10.7386	0.00341887	0.0251103
ENSG00000213753	11	7.87129	7.76597	7.86926	0.00396122	0.0375303
ENSG00000180747	11	10.7507	10.5889	10.7714	0.00484437	0.00802582
ENSG00000177400	11	4.74015	4.4531	4.75567	0.00492905	0.0258218
ENSG00000205266	11	5.97983	5.79127	5.98933	0.00518279	0.0258914
ENSG00000178440	11	6.80464	6.62152	6.79978	0.00524066	0.0289264
ENSG00000204149	11	7.916	7.76574	7.86851	0.00529551	0.141795
ENSG00000215206	11	5.17134	4.84375	5.11919	0.00540424	0.0703135
ENSG00000069651	11	8.80406	8.59372	8.71007	0.00554277	0.246988
ENSG00000164871	11	4.92298	4.70942	4.87943	0.00558866	0.0945855
ENSG00000164669	11	7.17303	7.01971	7.22799	0.00574941	0.00284602
ENSG00000204814	11	4.04865	3.77999	4.01968	0.00643918	0.0513134
ENSG00000078319	11	8.85019	8.98077	8.85413	0.00650567	0.0452882
ENSG00000174970	11	3.31129	3.0854	3.2916	0.00653654	0.0398469
ENSG00000132967	11	8.14776	7.96426	8.13463	0.00729843	0.035225
ENSG00000166693	11	3.8333	3.63655	3.79595	0.00739567	0.0858645
ENSG00000212695	11	11.9404	11.718	11.944	0.00747287	0.0669221
ENSG00000181903	11	4.17175	3.91058	4.16366	0.00760327	0.0589907
ENSG00000183747	11	4.99626	4.79399	4.97974	0.00814688	0.083239
ENSG00000196240	11	5.35277	5.14662	5.40552	0.00858017	0.0152598
ENSG00000184276	11	5.64556	5.35479	5.5957	0.00859871	0.092693
ENSG00000171471	11	8.04944	8.38958	8.00553	0.00866172	0.0484257
ENSG00000204147	11	7.4317	7.30277	7.38354	0.00912576	0.262663
ENSG00000181961	11	4.05246	3.90627	4.05566	0.00925826	0.0627011
ENSG00000184624	11	3.87039	3.67355	3.78338	0.0100137	0.268833
ENSG00000214873	11	4.64797	4.4063	4.63449	0.0101841	0.0668918
ENSG00000181371	11	4.26342	4.07929	4.29598	0.0107897	0.0330764
ENSG00000182565	11	3.49608	3.32155	3.49458	0.0118635	0.0704465
ENSG00000186234	11	6.66666	6.78203	6.74867	0.0122661	0.544645
ENSG00000149435	11	5.56191	5.39144	5.50652	0.0132656	0.228943
ENSG00000136682	11	6.96921	7.30261	6.92667	0.0133905	0.0530653
ENSG00000204816	11	6.80139	7.07001	6.6748	0.013488	0.00392171
ENSG00000182502	11	7.32048	7.4582	7.30934	0.0136957	0.0414711
ENSG00000171847	11	5.69223	5.52799	5.66962	0.0138111	0.145359
ENSG00000186599	11	4.81037	4.54069	4.79391	0.0140885	0.0732377
ENSG00000188439	11	3.60638	3.41285	3.53146	0.0145503	0.255854
ENSG00000198237	11	9.70003	9.4599	9.79458	0.0147356	0.016514
ENSG00000196436	11	7.66825	7.53287	7.66706	0.0153987	0.0858645
ENSG00000185037	11	3.68163	3.53629	3.69603	0.01555	0.0624546
ENSG00000153081	11	7.45272	7.3354	7.41024	0.0164325	0.245969
ENSG00000186148	11	5.79204	5.63226	5.74243	0.0171733	0.197712
ENSG00000181752	11	3.19028	3.00224	3.17999	0.0181425	0.114017
ENSG00000215407	11	5.92387	6.0674	5.90102	0.0184908	0.0632333
ENSG00000213985	11	6.92094	7.06908	6.89772	0.0192726	0.0452424
ENSG00000177023	11	4.12024	3.91264	3.99823	0.0194898	0.449776
ENSG00000177257	11	4.01946	3.75781	4.04984	0.0198917	0.0582451
ENSG00000205685	11	11.6079	11.4532	11.627	0.0212018	0.0484066
ENSG00000147996	11	7.124	7.40292	7.09174	0.0218001	0.0706996
ENSG00000182330	11	6.28554	6.08815	6.33578	0.0221811	0.0363547
ENSG00000198068	11	3.87726	3.72444	3.8333	0.0225158	0.232527
ENSG00000215799	11	8.61433	8.44844	8.50057	0.0232633	0.601304
ENSG00000179170	11	5.9358	5.81271	5.89827	0.023288	0.201893
ENSG00000188152	11	6.73708	6.56833	6.67936	0.0233834	0.289851
ENSG00000206142	11	4.21487	4.01464	4.14746	0.023436	0.222413
ENSG00000133475	11	6.20982	6.07963	6.20521	0.0237272	0.124627
ENSG00000176695	11	3.4513	3.26516	3.3882	0.0241616	0.290448
ENSG00000186645	11	5.94131	5.78285	5.91092	0.0243221	0.175657
ENSG00000204670	11	5.73375	5.54417	5.73362	0.025974	0.116419
ENSG00000204914	11	5.03796	4.80046	5.07505	0.0271448	0.0479002
ENSG00000177710	11	5.12838	4.93269	5.05408	0.0290731	0.307709
ENSG00000187060	11	6.2418	6.0541	6.13932	0.0291849	0.483999
ENSG00000214534	11	3.6565	3.49736	3.5493	0.0298462	0.579739
ENSG00000197446	11	5.35035	5.16796	5.34758	0.0299775	0.126115
ENSG00000116785	11	3.71415	3.59244	3.7187	0.0308455	0.0976657
ENSG00000205030	11	4.764	4.58869	4.76186	0.0308504	0.113766
ENSG00000214618	11	4.15648	3.83401	3.94202	0.0309028	0.552861
ENSG00000198229	11	5.79157	5.49351	5.88244	0.0311523	0.0379425
ENSG00000164845	11	6.86445	6.97294	6.93671	0.0327628	0.579014
ENSG00000136206	11	5.87235	5.72379	5.84523	0.0330079	0.231663
ENSG00000188280	11	3.1282	2.95237	3.10111	0.0376315	0.200828
ENSG00000204376	11	5.13846	4.98195	5.11826	0.0386937	0.193469
ENSG00000215419	11	6.40147	6.19473	6.39966	0.0387941	0.131174
ENSG00000197665	11	4.9131	4.74576	4.89428	0.0403976	0.175171
ENSG00000186119	11	4.39339	4.19915	4.33823	0.040428	0.26093
ENSG00000185208	11	8.98782	8.82429	8.89505	0.0408169	0.513878
ENSG00000205535	11	11.6502	11.5149	11.6732	0.0411167	0.0663577
ENSG00000185040	11	6.35124	6.21183	6.30474	0.042027	0.329633
ENSG00000214880	11	6.27017	6.16555	6.2515	0.042414	0.213442
ENSG00000155070	11	7.96814	7.84609	7.98964	0.0434989	0.0757681
ENSG00000169892	11	3.14841	2.84733	3.10328	0.0444807	0.202431
ENSG00000185864	11	9.83085	9.69262	9.78783	0.0453797	0.317504
ENSG00000184616	11	6.1912	6.06023	6.19512	0.045801	0.107346
ENSG00000182315	11	5.57295	5.39735	5.58065	0.0485657	0.131525
ENSG00000180974	11	4.20544	4.01011	4.20405	0.0521449	0.172377
ENSG00000177757	11	5.64758	5.48239	5.67221	0.0522339	0.0933136
ENSG00000214081	11	5.12172	4.97686	5.16238	0.053262	0.0626522
ENSG00000187010	11	4.90331	4.7922	4.91843	0.0557321	0.123461
ENSG00000215854	11	4.97465	4.80289	4.88191	0.0563653	0.556739
ENSG00000203989	11	4.85042	4.69329	4.82009	0.0565344	0.273149
ENSG00000214173	11	5.98409	5.83121	6.00926	0.0570712	0.10101
ENSG00000198618	11	9.72169	9.88847	9.71239	0.0575151	0.147756
ENSG00000181767	11	3.7479	3.63503	3.71051	0.0594047	0.375915
ENSG00000198251	11	6.50358	6.33315	6.52331	0.0603939	0.121542
ENSG00000188013	11	8.02408	8.15522	8.12027	0.0608935	0.746133
ENSG00000183506	11	9.55333	9.47382	9.52096	0.0614351	0.463255
ENSG00000214613	11	4.82546	4.59389	4.71363	0.0614502	0.476641
ENSG00000178162	11	4.38724	4.26128	4.38334	0.0619013	0.171159
ENSG00000176925	11	3.9496	3.80245	3.95465	0.0627533	0.156708
ENSG00000214401	11	7.23347	7.08571	7.20205	0.0640929	0.315374
ENSG00000203850	11	6.06946	5.90994	6.03734	0.0653285	0.282171
ENSG00000169876	11	4.37378	4.21344	4.37372	0.0657576	0.181071
ENSG00000215288	11	4.76213	4.55737	4.79963	0.0661251	0.111719
ENSG00000104827	11	6.10915	5.94686	6.12032	0.067536	0.187002
ENSG00000214883	11	9.59162	9.45094	9.66172	0.0702507	0.0477339
ENSG00000213759	11	2.93977	2.82886	2.91298	0.0773357	0.315845
ENSG00000174957	11	3.62194	3.46682	3.61127	0.0790854	0.218803
ENSG00000176787	11	3.48254	3.35049	3.43129	0.0830695	0.458539
ENSG00000180777	11	3.49468	3.67213	3.48089	0.0840161	0.228533
ENSG00000188400	11	7.90745	7.69237	8.36009	0.0841725	1.34987e-05
ENSG00000205505	11	6.05692	5.93557	6.06253	0.0867696	0.183597
ENSG00000175333	11	10.5563	10.3883	10.5016	0.0902787	0.415871
ENSG00000185097	11	3.74738	3.57913	3.73825	0.0909736	0.264037
ENSG00000196877	11	8.77559	8.6616	8.77762	0.0921088	0.204824
ENSG00000167390	11	5.43433	5.24136	5.55404	0.0925138	0.0348278
ENSG00000176809	11	7.35521	7.48058	7.39887	0.0925138	0.385806
ENSG00000128322	11	7.01512	6.89289	7.0059	0.0942173	0.28494
ENSG00000214627	11	8.24178	8.12478	8.16244	0.0965507	0.698089
ENSG00000196946	11	3.60031	3.50104	3.562	0.104416	0.45995
ENSG00000214802	11	10.9472	10.7931	11.0625	0.104848	0.0465947
ENSG00000198452	11	3.6861	3.56722	3.63609	0.105361	0.509224
ENSG00000144140	11	6.23225	6.40811	6.27673	0.106378	0.361181
ENSG00000126524	11	8.13222	8.27148	8.12671	0.107775	0.208799
ENSG00000179994	11	5.89641	5.78088	5.87423	0.109905	0.37821
ENSG00000182556	11	7.98526	8.08854	7.97195	0.110828	0.189611
ENSG00000205122	11	8.71348	8.38346	8.97499	0.111749	0.0269621
ENSG00000122674	11	7.69396	7.59534	7.71309	0.112111	0.161134
ENSG00000215198	11	7.35371	7.23343	7.39992	0.11223	0.1003
ENSG00000186223	11	5.97851	5.80665	6.00072	0.112287	0.123617
ENSG00000157322	11	6.22363	6.3383	6.22354	0.11319	0.286247
ENSG00000177990	11	7.54226	7.33215	7.67297	0.114901	0.050188
ENSG00000197896	11	5.8311	5.723	5.84597	0.116535	0.211342
ENSG00000170092	11	6.2408	6.13433	6.22176	0.119375	0.346037
ENSG00000123965	11	8.33525	8.4214	8.29402	0.121913	0.108591
ENSG00000182498	11	11.2567	11.1234	11.2239	0.122221	0.446479
ENSG00000181074	11	3.56165	3.41855	3.5779	0.122939	0.192179
ENSG00000198632	11	9.09674	9.21835	9.02063	0.129624	0.070645
ENSG00000183249	11	9.33894	9.49245	9.45845	0.131532	0.807057
ENSG00000204849	11	4.90416	4.79564	4.9367	0.133418	0.148922
ENSG00000205118	11	8.77499	8.46776	8.99032	0.134212	0.0510987
ENSG00000178306	11	3.21364	3.06548	3.11325	0.135359	0.716896
ENSG00000181958	11	3.47917	3.38396	3.42805	0.136346	0.656785
ENSG00000160172	11	6.47982	6.59198	6.53233	0.136595	0.540819
ENSG00000148965	11	4.09364	3.97799	4.10941	0.137074	0.190245
ENSG00000179799	11	4.23096	4.13892	4.1958	0.137074	0.51786
ENSG00000205506	11	6.00337	5.90643	5.98378	0.139463	0.382814
ENSG00000203827	11	9.78186	9.85301	9.81256	0.143375	0.598958
ENSG00000169203	11	10.7258	10.6168	10.6645	0.146572	0.663134
ENSG00000185871	11	7.91145	7.82748	7.86164	0.147636	0.633443
ENSG00000175319	11	9.65938	9.76319	9.70295	0.153744	0.544571
ENSG00000198062	11	3.59781	3.52931	3.5583	0.155154	0.672023
ENSG00000204437	11	4.4674	4.36715	4.45781	0.155506	0.315505
ENSG00000189011	11	9.61149	9.73629	9.56138	0.158787	0.152883
ENSG00000188073	11	9.92118	10.0542	9.89558	0.159419	0.228973
ENSG00000203975	11	5.53582	5.43489	5.514	0.166062	0.464737
ENSG00000205508	11	5.38318	5.29603	5.34442	0.166615	0.568363
ENSG00000171916	11	6.17211	6.25241	6.16284	0.1709	0.257909
ENSG00000215481	11	7.22858	7.1505	7.15834	0.174444	0.931876
ENSG00000205274	11	4.52418	4.30623	4.51494	0.178632	0.352094
ENSG00000124900	11	4.72888	4.64971	4.69261	0.183235	0.614674
ENSG00000157576	11	6.66928	6.44274	6.69449	0.184674	0.292318
ENSG00000151539	11	6.92416	6.98357	6.98294	0.189972	0.9919
ENSG00000203948	11	4.47402	4.37925	4.45934	0.192751	0.428323
ENSG00000214783	11	7.93448	8.05067	7.89905	0.195133	0.191182
ENSG00000204290	11	5.81319	5.71928	5.84597	0.196276	0.182277
ENSG00000215456	11	8.3911	8.31927	8.29155	0.197446	0.737326
ENSG00000204916	11	4.8945	4.77216	4.92496	0.197617	0.204824
ENSG00000174384	11	10.2281	10.3481	10.1956	0.19982	0.252044
ENSG00000196933	11	6.73349	6.57166	6.73434	0.203072	0.320962
ENSG00000139675	11	9.16363	9.08652	9.17853	0.215246	0.296512
ENSG00000215840	11	10.4652	10.5314	10.4621	0.220215	0.365937
ENSG00000184033	11	6.50358	6.39111	6.47763	0.220404	0.516682
ENSG00000181723	11	3.59558	3.48947	3.63001	0.242234	0.235271
ENSG00000189366	11	7.19605	7.14698	7.1323	0.243561	0.819813
ENSG00000215020	11	5.67216	5.58765	5.68199	0.249615	0.283993
ENSG00000167494	11	6.97283	6.8333	6.98692	0.251665	0.370885
ENSG00000215409	11	4.23511	4.13599	4.18262	0.260998	0.716963
ENSG00000181935	11	3.66423	3.52313	3.70971	0.264143	0.230242
ENSG00000205203	11	4.09344	4.01657	4.01969	0.267964	0.97373
ENSG00000214350	11	9.93546	9.69863	10.2145	0.268003	0.0525936
ENSG00000140839	11	6.36374	6.44242	6.34609	0.269125	0.356817
ENSG00000174093	11	9.43333	9.36313	9.4535	0.279166	0.329589
ENSG00000198875	11	8.09264	8.00963	8.09249	0.28009	0.419787
ENSG00000131885	11	5.5456	5.46947	5.53138	0.282076	0.522095
ENSG00000188219	11	3.97372	3.90558	3.95568	0.286657	0.559804
ENSG00000215355	11	6.1914	6.10478	6.16727	0.291667	0.610371
ENSG00000166492	11	5.87312	5.95389	5.86607	0.291771	0.424792
ENSG00000205120	11	10.0113	9.80663	10.2542	0.292369	0.0637508
ENSG00000187082	11	3.38419	3.30496	3.32831	0.306863	0.823252
ENSG00000177306	11	7.21358	7.28363	7.17638	0.307423	0.259897
ENSG00000214975	11	9.85025	9.93902	9.83007	0.309066	0.389696
ENSG00000205509	11	5.83384	5.76347	5.83323	0.309264	0.478879
ENSG00000166007	11	4.61185	4.51624	4.60295	0.310881	0.493698
ENSG00000205105	11	6.15932	6.24036	6.2376	0.31189	0.983181
ENSG00000169662	11	6.652	6.59598	6.56671	0.319991	0.728507
ENSG00000203849	11	5.02073	4.82859	4.83767	0.323643	0.97085
ENSG00000205124	11	9.92838	9.72415	10.1606	0.327496	0.0937119
ENSG00000182139	11	8.56572	8.48266	8.55264	0.328666	0.530852
ENSG00000156755	11	4.95216	4.88288	4.92034	0.329655	0.721676
ENSG00000198129	11	3.44432	3.33053	3.54362	0.335923	0.173675
ENSG00000205873	11	7.13777	7.04362	7.1097	0.336526	0.658863
ENSG00000215354	11	5.75351	5.67602	5.72735	0.340907	0.666778
ENSG00000181950	11	3.82897	3.74386	3.81505	0.362017	0.547898
ENSG00000215376	11	5.99622	5.92019	5.97435	0.36402	0.663885
ENSG00000204276	11	4.65547	4.58239	4.65943	0.380915	0.470092
ENSG00000170160	11	6.92089	6.77224	7.31768	0.38259	0.00357637
ENSG00000214801	11	11.4803	11.3894	11.5892	0.387137	0.167919
ENSG00000169040	11	4.51186	4.38284	4.54889	0.3872	0.396116
ENSG00000124399	11	4.89045	4.71781	4.85953	0.39076	0.596357
ENSG00000182759	11	7.19683	7.12892	7.15881	0.40146	0.815641
ENSG00000196161	11	8.98496	8.91939	8.98596	0.403475	0.524713
ENSG00000212755	11	5.93923	6.0115	5.93317	0.411618	0.504737
ENSG00000205482	11	6.53571	6.47567	6.49986	0.411706	0.834335
ENSG00000189166	11	8.05344	7.99225	7.93203	0.420695	0.534437
ENSG00000196960	11	3.58426	3.45917	3.82997	0.421531	0.0232586
ENSG00000215559	11	6.20737	6.31472	6.10187	0.424062	0.217748
ENSG00000204776	11	3.73607	3.84076	3.68517	0.428683	0.288566
ENSG00000127957	11	9.26671	9.30852	9.28687	0.431601	0.797364
ENSG00000175886	11	7.59581	7.46371	7.56876	0.440326	0.667884
ENSG00000214820	11	7.82353	7.78954	7.8111	0.446516	0.723347
ENSG00000186146	11	3.51355	3.42269	3.4457	0.46752	0.889347
ENSG00000198156	11	8.79528	8.73679	8.78021	0.468459	0.692365
ENSG00000214891	11	4.09062	4.02671	4.05654	0.49498	0.827931
ENSG00000185061	11	6.55968	6.60394	6.55183	0.501365	0.578926
ENSG00000182021	11	6.221	6.18124	6.17491	0.504515	0.929973
ENSG00000185304	11	7.83092	7.79066	7.86222	0.50764	0.382005
ENSG00000212754	11	5.84104	5.89418	5.84617	0.513673	0.662088
ENSG00000187589	11	4.00573	4.04981	3.9615	0.529775	0.318236
ENSG00000187653	11	10.9416	10.9983	10.9423	0.537204	0.678416
ENSG00000214525	11	5.10991	5.00395	5.17548	0.5386	0.460444
ENSG00000215146	11	4.00458	3.91335	3.84202	0.543372	0.718837
ENSG00000196313	11	8.07354	8.04641	8.05178	0.54644	0.936588
ENSG00000187627	11	7.90397	7.86317	7.94506	0.559886	0.386733
ENSG00000198601	11	4.12393	4.08702	4.14844	0.56358	0.466389
ENSG00000198874	11	6.73498	6.76586	6.77016	0.572018	0.959362
ENSG00000204805	11	6.70754	6.63782	6.72694	0.588575	0.610218
ENSG00000172974	11	9.19475	9.2377	9.18797	0.589664	0.655889
ENSG00000185834	11	12.4317	12.4649	12.4101	0.590135	0.523719
ENSG00000153143	11	3.27563	3.30655	3.25092	0.596986	0.497031
ENSG00000188831	11	3.78056	3.84212	3.81578	0.597519	0.86527
ENSG00000205212	11	6.3698	6.41221	6.29984	0.607856	0.306535
ENSG00000177799	11	3.5028	3.43758	3.56316	0.608639	0.451192
ENSG00000214439	11	7.88895	7.96038	7.85822	0.609337	0.5882
ENSG00000152726	11	8.22587	8.19579	8.26313	0.614248	0.44122
ENSG00000099290	11	8.27795	8.25087	8.31084	0.625802	0.464881
ENSG00000185203	11	5.66105	5.69777	5.63783	0.631919	0.494873
ENSG00000143631	11	5.95413	5.98497	5.95203	0.642505	0.72624
ENSG00000205946	11	5.88354	5.84196	5.89269	0.661617	0.685326
ENSG00000185596	11	7.98507	7.96289	7.93041	0.664946	0.635371
ENSG00000173727	11	6.88908	6.84283	6.88138	0.665779	0.799618
ENSG00000158517	11	6.10761	6.06727	6.12205	0.668225	0.681327
ENSG00000198312	11	9.53773	9.5686	9.62589	0.686944	0.566176
ENSG00000086205	11	4.82078	4.77139	4.89078	0.691237	0.396532
ENSG00000136149	11	11.2339	11.2634	11.2228	0.702992	0.727795
ENSG00000165055	11	8.75385	8.7769	8.76682	0.718519	0.9167
ENSG00000172971	11	7.63528	7.66509	7.62763	0.720817	0.763606
ENSG00000205025	11	3.29795	3.26606	3.24387	0.722776	0.8689
ENSG00000184301	11	4.36332	4.32198	4.29033	0.73558	0.850974
ENSG00000120555	11	5.01468	4.99759	4.98124	0.745593	0.812571
ENSG00000154874	11	6.85996	6.80989	7.06136	0.745623	0.133293
ENSG00000177233	11	4.50277	4.47851	4.4811	0.75312	0.979498
ENSG00000157344	11	8.84213	8.82091	8.81595	0.757532	0.961628
ENSG00000212638	11	7.30304	7.27103	7.30106	0.76815	0.850686
ENSG00000184721	11	5.91841	5.89237	5.90478	0.768351	0.920195
ENSG00000212640	11	7.1453	7.11733	7.14351	0.779933	0.857724
ENSG00000145736	11	7.28783	7.26017	7.36833	0.787843	0.399214
ENSG00000189415	11	4.65127	4.68328	4.59115	0.788752	0.547318
ENSG00000150244	11	3.51901	3.49848	3.44688	0.804983	0.645039
ENSG00000205452	11	5.68213	5.65029	5.58892	0.810999	0.715756
ENSG00000142794	11	7.55552	7.54201	7.57503	0.812956	0.674225
ENSG00000116219	11	6.73255	6.75247	6.75184	0.81694	0.995566
ENSG00000184523	11	6.05606	6.07192	6.01257	0.818953	0.444936
ENSG00000214034	11	8.33753	8.31395	8.32132	0.822454	0.959604
ENSG00000205246	11	8.66778	8.68418	8.69039	0.824444	0.956847
ENSG00000013573	11	6.81144	6.79422	6.82462	0.83376	0.796793
ENSG00000197522	11	8.02351	8.00191	8.07279	0.834847	0.589325
ENSG00000215512	11	5.5017	5.4835	5.41928	0.840003	0.579028
ENSG00000171928	11	8.21457	8.19288	8.27463	0.840611	0.523388
ENSG00000144134	11	8.97898	8.96697	8.97039	0.851547	0.97053
ENSG00000170629	11	6.89516	6.91441	6.93303	0.851591	0.906316
ENSG00000182945	11	5.83825	5.82556	5.76504	0.903677	0.645578
ENSG00000186704	11	8.73445	8.74167	8.68038	0.907027	0.44221
ENSG00000170919	11	8.22752	8.23318	8.28631	0.921383	0.418757
ENSG00000214754	11	5.89905	5.90825	5.94714	0.927815	0.76305
ENSG00000183054	11	9.46183	9.45475	9.49341	0.933141	0.737928
ENSG00000169629	11	9.65238	9.6468	9.68499	0.947128	0.73797
ENSG00000196934	11	6.24542	6.25111	6.18734	0.94827	0.626501
ENSG00000214826	11	6.68266	6.6771	6.70014	0.94968	0.85352
ENSG00000105889	11	3.98095	3.97574	4.15764	0.950024	0.0162056
ENSG00000214893	11	7.17609	7.1793	7.10666	0.971425	0.522688
ENSG00000168204	11	8.46956	8.47204	8.48287	0.973606	0.915763
ENSG00000156750	11	5.59406	5.59548	5.58439	0.985541	0.919307
ENSG00000197465	11	5.01256	5.0113	5.03155	0.987442	0.854937
ENSG00000164740	11	6.07867	6.07954	6.05239	0.987508	0.714825
ENSG00000182782	11	5.37356	5.37229	5.3934	0.992944	0.916032
ENSG00000184492	11	6.6917	6.69127	6.66068	0.995466	0.765304
ENSG00000183628	10	8.29747	8.82613	8.25055	1.83548e-13	2.07002e-08
ENSG00000187667	10	6.02819	6.47451	6.03619	1.25209e-12	2.14523e-08
ENSG00000118976	10	6.83501	6.49144	6.75104	2.47763e-11	1.10909e-05
ENSG00000196357	10	6.73042	6.2671	6.64151	3.43045e-11	3.77298e-05
ENSG00000206127	10	6.2301	6.68529	6.22316	1.20349e-09	2.24959e-06
ENSG00000178115	10	6.22416	6.71272	6.17944	1.67833e-09	9.85039e-07
ENSG00000154537	10	6.97202	6.47655	6.8946	2.3833e-09	0.000135287
ENSG00000214585	10	9.25761	8.70611	9.18314	2.75148e-09	1.40833e-05
ENSG00000205271	10	7.58736	7.11771	7.48895	7.22613e-09	0.000163879
ENSG00000196267	10	7.06685	6.74472	7.08064	1.61159e-08	2.10067e-05
ENSG00000205272	10	7.93714	7.42259	7.84065	2.59128e-08	4.88418e-05
ENSG00000189251	10	9.18973	9.54111	9.26098	3.67838e-08	0.000378252
ENSG00000186288	10	6.79453	7.23057	6.90385	1.04809e-07	0.000465535
ENSG00000184246	10	7.75662	7.29365	7.64599	1.37574e-07	0.000564511
ENSG00000174428	10	8.22153	7.8239	8.21494	3.36211e-07	0.000851821
ENSG00000159266	10	8.03951	7.80613	8.00712	1.25536e-06	0.000917145
ENSG00000154529	10	8.37549	7.63388	7.85711	1.3078e-06	0.120028
ENSG00000205270	10	8.84478	8.58089	8.75106	1.62524e-06	0.0152525
ENSG00000161583	10	7.93128	7.62363	7.90435	3.19826e-06	0.00162389
ENSG00000185128	10	7.87179	7.57046	7.825	6.56862e-06	0.00350381
ENSG00000189309	10	7.55827	7.26558	7.52732	6.83115e-06	0.00294245
ENSG00000123870	10	4.74964	4.43044	4.76428	1.29266e-05	0.000763386
ENSG00000171291	10	7.04636	6.76683	7.09056	1.3958e-05	0.00038877
ENSG00000188755	10	6.21613	5.9778	6.17548	1.94087e-05	0.0075544
ENSG00000213474	10	8.38155	8.11666	8.35146	2.40393e-05	0.00588316
ENSG00000174115	10	7.98655	7.69935	7.96459	2.4321e-05	0.00335914
ENSG00000176923	10	4.92444	4.57669	4.92134	2.57224e-05	0.00184047
ENSG00000161132	10	6.14569	6.39846	6.16166	3.249e-05	0.00684045
ENSG00000214562	10	7.29546	7.07055	7.25908	3.29451e-05	0.00972966
ENSG00000213413	10	7.19713	6.91861	7.19178	3.55487e-05	0.00276511
ENSG00000204471	10	6.86523	6.58595	6.85412	5.20605e-05	0.00514333
ENSG00000205176	10	6.86793	6.41382	6.85998	6.12005e-05	0.00194503
ENSG00000196648	10	7.27606	7.00117	7.21673	6.91343e-05	0.0165069
ENSG00000188599	10	9.38871	9.16592	9.28781	7.14989e-05	0.0569622
ENSG00000204517	10	7.03683	6.76749	6.97584	8.41403e-05	0.00753272
ENSG00000180610	10	7.41994	7.21575	7.41128	9.49028e-05	0.00457955
ENSG00000205773	10	5.91437	5.66645	5.87181	0.000118406	0.0208443
ENSG00000166998	10	8.13197	8.49357	7.99878	0.000125506	0.000182939
ENSG00000197978	10	7.51706	7.25907	7.43116	0.000159573	0.0509813
ENSG00000162685	10	7.6764	7.93111	7.6396	0.000186374	0.00129462
ENSG00000197658	10	4.05429	3.80084	4.01243	0.000201516	0.0176222
ENSG00000204554	10	5.73801	6.53136	5.88572	0.000213599	0.020972
ENSG00000205337	10	7.11538	6.72655	7.13823	0.000255063	0.00240565
ENSG00000184206	10	7.41746	7.2026	7.34628	0.00027371	0.0684442
ENSG00000147380	10	5.35816	5.12704	5.32427	0.000282087	0.0243447
ENSG00000175322	10	5.09558	4.76908	5.08548	0.000286039	0.00646583
ENSG00000197689	10	5.15212	4.91104	5.13733	0.000352641	0.00956875
ENSG00000153666	10	5.83625	6.02226	5.84948	0.00037126	0.0120287
ENSG00000197054	10	5.8082	5.59611	5.83402	0.000448434	0.0043445
ENSG00000205822	10	3.883	3.62045	3.88243	0.000454395	0.0158714
ENSG00000184040	10	4.72507	4.5159	4.72551	0.000516675	0.00609032
ENSG00000182652	10	4.26334	4.00857	4.22375	0.000589655	0.0232614
ENSG00000185158	10	6.75907	6.54526	6.67989	0.000696034	0.113751
ENSG00000174353	10	8.31301	8.11495	8.29644	0.000815698	0.0318827
ENSG00000120952	10	3.90292	3.65831	3.88902	0.000825534	0.0247712
ENSG00000188234	10	8.34576	8.17149	8.30057	0.000837822	0.0500648
ENSG00000184490	10	5.58735	5.28564	5.59263	0.000862548	0.00933622
ENSG00000204831	10	5.97875	6.27359	5.84847	0.000893999	8.25106e-05
ENSG00000214822	10	6.10983	5.87896	6.10339	0.0010202	0.0212763
ENSG00000214311	10	6.2227	6.36611	6.26827	0.0011261	0.0530885
ENSG00000205017	10	6.6991	6.96982	6.73995	0.00112636	0.0511529
ENSG00000185385	10	4.61729	4.34267	4.59485	0.00120219	0.0337978
ENSG00000215372	10	3.78666	3.5818	3.78384	0.00136486	0.028087
ENSG00000184923	10	7.40943	7.20061	7.36279	0.00140344	0.0707232
ENSG00000204561	10	6.06853	5.77682	6.08441	0.00143052	0.0110381
ENSG00000188424	10	5.01643	4.76687	4.97444	0.00143986	0.0349332
ENSG00000175170	10	6.1666	6.35535	6.16726	0.00146293	0.0106384
ENSG00000212712	10	5.57669	5.2793	5.55165	0.00149552	0.0299857
ENSG00000166160	10	5.20837	4.92773	5.18568	0.00173643	0.023673
ENSG00000171931	10	4.85595	4.68556	4.79686	0.00180201	0.151097
ENSG00000184902	10	7.33557	7.89574	7.58909	0.00181176	0.166307
ENSG00000197976	10	6.76595	6.62278	6.74233	0.00191677	0.0773085
ENSG00000206228	10	9.16909	8.92108	9.14793	0.00200735	0.0425801
ENSG00000129204	10	6.27769	6.14559	6.33756	0.00228305	0.000793105
ENSG00000128422	10	6.11639	5.92911	6.1214	0.00232448	0.0171652
ENSG00000185177	10	3.74426	3.55756	3.75298	0.00248223	0.0259286
ENSG00000122497	10	10.2118	10.3779	10.2555	0.00254682	0.136791
ENSG00000170848	10	4.87692	4.67361	4.83388	0.00320008	0.0870076
ENSG00000173272	10	8.54639	8.74677	8.55584	0.0032787	0.0579846
ENSG00000215790	10	9.06156	8.87423	9.0388	0.00332786	0.0501301
ENSG00000130538	10	3.99003	3.75332	3.93475	0.00339763	0.0942763
ENSG00000166926	10	3.47911	3.29944	3.46139	0.00341887	0.0443559
ENSG00000187545	10	4.66983	4.41958	4.69133	0.00348495	0.0124118
ENSG00000205209	10	4.92532	4.7266	4.92103	0.00354148	0.0405621
ENSG00000172650	10	7.87074	7.72056	7.83447	0.00365554	0.0885332
ENSG00000179817	10	4.96954	4.72434	4.92948	0.00367375	0.0712924
ENSG00000203812	10	8.4936	9.06768	8.70226	0.00386143	0.152096
ENSG00000157021	10	6.87357	6.74298	6.93301	0.00388337	0.00160762
ENSG00000204677	10	6.33068	6.10049	6.19754	0.00389443	0.357031
ENSG00000007129	10	5.70813	5.96257	5.68008	0.0042684	0.033847
ENSG00000197414	10	5.14354	4.91874	5.14086	0.00441743	0.0426208
ENSG00000189092	10	6.27513	6.05981	6.31924	0.004546	0.00433926
ENSG00000122543	10	6.12243	5.83081	6.14925	0.0046097	0.0235146
ENSG00000067601	10	10.5779	10.7338	10.5741	0.0046851	0.0333585
ENSG00000104938	10	4.67024	4.45603	4.62684	0.00485756	0.0893812
ENSG00000051415	10	6.31434	6.10557	6.248	0.00517164	0.166555
ENSG00000180764	10	7.11911	6.98536	7.12352	0.00531438	0.0299083
ENSG00000177359	10	4.88368	5.25452	4.8175	0.00533396	0.0228792
ENSG00000180068	10	5.29709	5.07266	5.27866	0.00568677	0.0521255
ENSG00000125498	10	5.16773	4.96383	5.14006	0.00602825	0.0843691
ENSG00000204688	10	5.14422	4.97189	5.14911	0.00612107	0.059709
ENSG00000188269	10	4.12706	3.90814	4.06058	0.0066126	0.153612
ENSG00000163386	10	10.5298	10.6781	10.565	0.00691787	0.172536
ENSG00000167633	10	5.27442	5.05656	5.26869	0.00711388	0.0641904
ENSG00000204880	10	5.79246	5.57616	5.76856	0.00737817	0.0941543
ENSG00000215339	10	3.57643	3.41855	3.52426	0.00745393	0.165878
ENSG00000204509	10	4.24551	3.95619	4.26341	0.00747906	0.0321548
ENSG00000203663	10	5.19232	5.59939	5.22768	0.00765279	0.0730006
ENSG00000197263	10	4.41849	4.17048	4.39336	0.00804407	0.0952754
ENSG00000181273	10	4.69683	4.28501	4.74094	0.00805062	0.00981254
ENSG00000213797	10	5.61738	5.38242	5.61577	0.00829043	0.0550111
ENSG00000177212	10	5.61855	5.39027	5.65548	0.00848062	0.0202641
ENSG00000215405	10	4.87921	4.6991	4.86853	0.00893636	0.0915556
ENSG00000133460	10	6.45881	6.60927	6.4641	0.00959933	0.0930577
ENSG00000188438	10	5.67181	5.40882	5.65817	0.0104671	0.0868869
ENSG00000204491	10	4.99261	4.75551	5.00969	0.0105592	0.0492616
ENSG00000197262	10	4.4877	4.74714	4.56647	0.0108491	0.212785
ENSG00000197083	10	5.54695	5.26865	5.5093	0.0110819	0.111889
ENSG00000177489	10	5.18318	4.98215	5.15444	0.0111171	0.0813634
ENSG00000174667	10	4.99654	4.77946	4.93393	0.0116638	0.176304
ENSG00000204172	10	8.2692	8.14515	8.2595	0.0116799	0.0827476
ENSG00000188375	10	9.43662	9.62543	9.46685	0.0117704	0.129198
ENSG00000213974	10	6.11383	5.96279	6.09288	0.0118404	0.106796
ENSG00000173678	10	5.21177	5.04453	5.1901	0.0133907	0.10583
ENSG00000161047	10	4.88863	4.58873	4.86357	0.0137447	0.0862691
ENSG00000184294	10	5.06861	4.79376	4.98217	0.0139446	0.185238
ENSG00000204869	10	4.90538	4.73579	4.85422	0.0147325	0.185401
ENSG00000148828	10	5.49054	5.32272	5.50184	0.0147679	0.0637367
ENSG00000214300	10	5.85681	5.705	5.84206	0.0149718	0.0901437
ENSG00000204687	10	4.50161	4.29683	4.54093	0.016886	0.0395021
ENSG00000116652	10	7.2939	6.8396	7.35152	0.0170734	0.0597438
ENSG00000171084	10	7.16357	7.29415	7.20817	0.0175859	0.209052
ENSG00000214653	10	5.03642	4.84392	5.01164	0.017939	0.0905994
ENSG00000204873	10	4.69449	4.45815	4.65947	0.0183228	0.147358
ENSG00000177992	10	5.6848	5.50639	5.66272	0.020141	0.137123
ENSG00000172150	10	4.32229	4.09681	4.31435	0.0212782	0.0740774
ENSG00000188185	10	7.09137	6.94119	7.11575	0.0213881	0.0454349
ENSG00000167360	10	3.53532	3.28578	3.52202	0.0215234	0.123926
ENSG00000183666	10	10.227	10.0271	10.3424	0.021609	0.0143849
ENSG00000215371	10	4.42414	4.21025	4.4442	0.0238163	0.0763202
ENSG00000184635	10	6.88822	6.66167	6.93144	0.0242584	0.0147519
ENSG00000204031	10	6.16712	5.99055	6.15274	0.0243859	0.114633
ENSG00000197990	10	3.68565	3.54899	3.68692	0.0245221	0.0896401
ENSG00000188933	10	8.65476	8.34674	9.18818	0.0251023	3.40656e-07
ENSG00000197373	10	9.79491	9.99386	9.80162	0.026126	0.117336
ENSG00000189013	10	5.16898	5.00835	5.18199	0.0267864	0.0659849
ENSG00000204693	10	9.90208	9.69795	9.87661	0.0272086	0.188729
ENSG00000183938	10	5.74783	5.2954	5.84609	0.027922	0.0186052
ENSG00000128284	10	5.07448	4.94404	5.08269	0.0279653	0.0790502
ENSG00000196131	10	4.92962	4.66079	4.95518	0.0280175	0.0758802
ENSG00000140478	10	4.80256	4.68437	4.76835	0.0283053	0.25553
ENSG00000206474	10	4.12006	3.96058	4.14558	0.0292927	0.0653751
ENSG00000179277	10	8.10883	8.24727	8.20521	0.0314447	0.672357
ENSG00000170255	10	4.99491	4.78212	4.93681	0.0325034	0.271489
ENSG00000170373	10	5.77996	5.64355	5.7817	0.0329978	0.131542
ENSG00000215859	10	4.19078	4.33367	4.21328	0.0333563	0.194749
ENSG00000176299	10	3.77892	3.58257	3.75779	0.0345393	0.156518
ENSG00000104818	10	5.65755	5.43522	5.62966	0.0355577	0.188375
ENSG00000204697	10	3.82079	3.65432	3.81962	0.0389781	0.155013
ENSG00000198573	10	5.33302	5.1416	5.33902	0.0395765	0.125358
ENSG00000181819	10	4.8859	5.03953	4.86255	0.0403467	0.0963137
ENSG00000215092	10	4.96506	4.79881	4.99534	0.0410462	0.0507714
ENSG00000213795	10	8.22208	8.06624	8.32315	0.0417163	0.00138606
ENSG00000186925	10	5.93532	5.74558	5.88116	0.0418868	0.255015
ENSG00000179826	10	5.34041	5.18985	5.33128	0.043045	0.149026
ENSG00000189052	10	5.5112	5.31938	5.45212	0.0430954	0.262831
ENSG00000214719	10	7.97735	7.88976	8.01441	0.0442624	0.0232131
ENSG00000127530	10	4.31367	4.15503	4.26715	0.0444012	0.289966
ENSG00000185041	10	4.98043	4.82324	4.90717	0.0444339	0.467535
ENSG00000187272	10	5.79711	5.6377	5.79121	0.0455483	0.153334
ENSG00000174450	10	5.44004	5.30323	5.44448	0.0456437	0.160311
ENSG00000204434	10	7.2235	7.32845	7.2249	0.0466344	0.150421
ENSG00000214614	10	6.35355	6.19264	6.34939	0.0467697	0.178596
ENSG00000176312	10	3.85934	3.6949	3.85114	0.0498566	0.164493
ENSG00000204194	10	11.2803	11.4633	11.2683	0.0504237	0.139569
ENSG00000189423	10	8.93208	8.66577	9.43488	0.0505937	2.95209e-06
ENSG00000197149	10	8.70169	8.86787	8.71817	0.0524914	0.232163
ENSG00000183305	10	6.09258	5.93613	6.0829	0.0526582	0.212941
ENSG00000214787	10	3.58632	3.39615	3.5188	0.0530543	0.29978
ENSG00000154198	10	4.59108	4.70849	4.60165	0.0548656	0.206492
ENSG00000204368	10	4.26912	4.14367	4.23192	0.0551016	0.331169
ENSG00000183441	10	9.72026	9.83926	9.76732	0.0579878	0.402166
ENSG00000198064	10	10.3892	10.2525	10.3377	0.058614	0.403472
ENSG00000197621	10	3.19622	3.06673	3.18188	0.0594828	0.249666
ENSG00000161807	10	3.95623	3.74336	4.0154	0.0620684	0.0724928
ENSG00000139223	10	3.68629	3.39875	3.59174	0.0622153	0.268434
ENSG00000212993	10	5.89288	5.77762	5.87554	0.0657576	0.279338
ENSG00000204748	10	5.15903	4.97163	5.13285	0.0665975	0.24402
ENSG00000125804	10	5.75399	5.87124	5.75707	0.0668862	0.183929
ENSG00000213444	10	4.50862	4.39596	4.48598	0.0671632	0.255736
ENSG00000196796	10	8.40909	8.29673	8.37558	0.0696919	0.37169
ENSG00000198022	10	2.28369	2.14645	2.20372	0.0700652	0.555291
ENSG00000204245	10	4.05093	4.15987	4.02394	0.0719856	0.0489436
ENSG00000205044	10	4.36665	4.21439	4.30378	0.0731345	0.437092
ENSG00000171942	10	5.57477	5.44085	5.56024	0.0747825	0.250755
ENSG00000187870	10	4.46323	4.61155	4.45745	0.0759373	0.157505
ENSG00000214280	10	4.89487	5.06556	4.98459	0.077118	0.525964
ENSG00000187754	10	4.66246	4.52822	4.61843	0.0794934	0.384955
ENSG00000157950	10	4.7503	4.63179	4.69973	0.084833	0.482517
ENSG00000075886	10	7.15251	7.05166	7.15014	0.0855788	0.234419
ENSG00000008128	10	6.71503	6.63381	6.67354	0.0862419	0.508442
ENSG00000186543	10	6.96762	6.86812	6.94389	0.0895162	0.330762
ENSG00000196815	10	6.10411	5.96683	6.11825	0.0910748	0.186193
ENSG00000205804	10	7.01924	6.89035	6.89172	0.0911913	0.990601
ENSG00000186481	10	4.21101	4.31028	4.19046	0.0930199	0.155091
ENSG00000142789	10	6.4907	6.35973	6.52228	0.093602	0.133468
ENSG00000163612	10	6.87199	6.94516	6.87706	0.0936457	0.179862
ENSG00000212844	10	5.85573	5.71821	5.8853	0.0955631	0.151128
ENSG00000170667	10	8.26244	8.42174	8.16868	0.0989316	0.0369915
ENSG00000172186	10	6.19369	6.08199	6.18713	0.104343	0.245969
ENSG00000188002	10	6.36834	6.45785	6.31985	0.108023	0.0662259
ENSG00000196433	10	5.10545	4.97651	5.0973	0.111451	0.308637
ENSG00000179755	10	6.62687	6.50354	6.62114	0.115837	0.282454
ENSG00000214552	10	7.17369	7.3421	7.03186	0.117455	0.0274594
ENSG00000215379	10	4.40384	4.23984	4.44156	0.126225	0.103959
ENSG00000168995	10	5.86743	5.76025	5.86233	0.127025	0.305186
ENSG00000196183	10	8.5155	8.65103	8.50768	0.130326	0.271255
ENSG00000212932	10	7.39131	7.30993	7.35528	0.131057	0.564693
ENSG00000215908	10	7.31389	7.23158	7.25702	0.132567	0.736886
ENSG00000124578	10	5.48217	5.33504	5.57298	0.143739	0.0782266
ENSG00000183632	10	5.36377	5.223	5.29187	0.147636	0.617231
ENSG00000101441	10	5.84837	5.73026	5.8165	0.148709	0.463846
ENSG00000205718	10	4.42085	4.25342	4.38287	0.153173	0.426407
ENSG00000172969	10	4.62696	4.52221	4.61885	0.15693	0.364616
ENSG00000196585	10	6.20605	6.09726	6.17631	0.158512	0.471114
ENSG00000183600	10	6.84265	6.71487	6.82498	0.163796	0.406802
ENSG00000215915	10	6.16618	6.09744	6.13467	0.165897	0.614134
ENSG00000214090	10	3.90953	3.99333	3.88068	0.167565	0.180801
ENSG00000127515	10	2.82999	2.73248	2.783	0.176393	0.51406
ENSG00000206014	10	7.22718	7.31723	7.20455	0.18448	0.233805
ENSG00000149531	10	7.60192	7.42616	7.60447	0.197595	0.308132
ENSG00000187267	10	3.79387	3.7064	3.72355	0.209214	0.873404
ENSG00000099389	10	5.85955	5.79716	5.913	0.217352	0.0713646
ENSG00000205596	10	5.38302	5.22212	5.50445	0.220588	0.0940948
ENSG00000197617	10	4.14884	4.04573	4.13787	0.233094	0.39064
ENSG00000206034	10	5.33367	5.2275	5.358	0.235371	0.22676
ENSG00000183206	10	4.21571	4.14468	4.16211	0.238616	0.826986
ENSG00000174368	10	10.3257	10.4275	10.3039	0.242701	0.322677
ENSG00000180574	10	3.89081	3.71249	3.86325	0.250302	0.404795
ENSG00000197627	10	6.383	6.2875	6.40964	0.253477	0.207029
ENSG00000196593	10	5.55868	5.47534	5.52368	0.253836	0.653039
ENSG00000214581	10	2.58916	2.45183	2.47699	0.259578	0.885573
ENSG00000169253	10	4.97095	4.85057	5.05306	0.259912	0.180875
ENSG00000160072	10	7.07641	7.02467	7.05468	0.263208	0.647274
ENSG00000196578	10	3.5244	3.43157	3.49896	0.270097	0.542213
ENSG00000144015	10	4.03748	3.93142	4.06277	0.27026	0.353158
ENSG00000214262	10	10.9473	10.8526	10.9894	0.272811	0.23012
ENSG00000196772	10	3.30652	3.18478	3.29428	0.281497	0.491602
ENSG00000204456	10	3.50418	3.36292	3.46722	0.288868	0.560777
ENSG00000178161	10	3.35621	3.23312	3.38683	0.303887	0.34953
ENSG00000205702	10	6.51312	6.44015	6.46056	0.305253	0.843682
ENSG00000175265	10	7.7761	7.87514	7.67821	0.305965	0.0954875
ENSG00000186825	10	7.44317	7.37607	7.44227	0.337947	0.514935
ENSG00000214925	10	6.39813	6.25931	6.32265	0.33811	0.755421
ENSG00000188383	10	7.54722	7.48252	7.55072	0.339179	0.451491
ENSG00000139133	10	7.83161	7.91552	7.90314	0.344633	0.929416
ENSG00000197704	10	6.27114	6.47416	6.17241	0.351032	0.356457
ENSG00000180152	10	3.96619	4.06135	3.97416	0.356993	0.478412
ENSG00000182418	10	6.69579	6.62627	6.64309	0.359677	0.883822
ENSG00000105366	10	5.54017	5.47122	5.5411	0.373866	0.497081
ENSG00000165121	10	6.88653	6.79725	6.96412	0.392345	0.210739
ENSG00000204919	10	4.94244	4.8642	4.91117	0.407272	0.743999
ENSG00000215315	10	7.1872	7.23868	7.15118	0.431228	0.290433
ENSG00000106610	10	7.29619	7.35725	7.25859	0.452595	0.354129
ENSG00000103832	10	5.89347	5.9317	5.84063	0.461466	0.185872
ENSG00000197332	10	4.99499	4.95307	5.04763	0.468921	0.19449
ENSG00000107018	10	4.49052	4.44376	4.47611	0.495811	0.736757
ENSG00000214391	10	10.2213	10.2527	10.2187	0.498141	0.59735
ENSG00000204625	10	4.39763	4.33314	4.38104	0.50453	0.734272
ENSG00000178130	10	5.83151	5.77535	5.77712	0.522104	0.987847
ENSG00000206149	10	8.8015	8.76536	8.83029	0.540886	0.353367
ENSG00000196908	10	6.91109	6.86686	6.89708	0.560873	0.782708
ENSG00000178604	10	5.69542	5.63596	5.7036	0.575186	0.617165
ENSG00000196656	10	9.05186	8.96387	9.06058	0.578425	0.6346
ENSG00000135213	10	8.40548	8.37929	8.39113	0.585768	0.870201
ENSG00000187988	10	3.90641	3.86446	3.88852	0.587584	0.831939
ENSG00000206033	10	6.18204	6.22754	6.14642	0.589332	0.452551
ENSG00000214886	10	3.27496	3.19269	3.34189	0.594915	0.433267
ENSG00000188856	10	9.00271	8.94206	9.0168	0.612566	0.664325
ENSG00000205095	10	7.10558	7.05735	7.12868	0.618955	0.599152
ENSG00000196406	10	5.08834	5.04819	5.02838	0.649141	0.880123
ENSG00000204118	10	4.92933	4.89461	4.97502	0.655453	0.443067
ENSG00000181984	10	5.43568	5.41689	5.40327	0.662065	0.81162
ENSG00000143556	10	4.4971	4.45116	4.51563	0.675452	0.66036
ENSG00000174501	10	10.1009	10.1545	10.0336	0.68139	0.475145
ENSG00000196862	10	8.45819	8.42933	8.48412	0.690351	0.579226
ENSG00000124097	10	7.21004	7.26013	7.20042	0.690736	0.729027
ENSG00000185051	10	6.99947	6.96788	6.94357	0.692225	0.804968
ENSG00000214135	10	9.11237	9.08202	9.09649	0.702468	0.894793
ENSG00000188078	10	6.61072	6.58171	6.61146	0.713309	0.802109
ENSG00000182487	10	6.39237	6.36098	6.41848	0.7192	0.637739
ENSG00000205947	10	6.03963	6.0109	6.0662	0.735787	0.635187
ENSG00000214242	10	7.31403	7.34555	7.20591	0.759123	0.234939
ENSG00000173876	10	5.52293	5.5052	5.49078	0.766133	0.853689
ENSG00000212717	10	2.91261	2.95611	2.83235	0.777429	0.47182
ENSG00000215033	10	5.66063	5.68303	5.65194	0.778337	0.787021
ENSG00000180229	10	9.16682	9.15153	9.1916	0.786163	0.567507
ENSG00000214765	10	7.0489	7.07647	7.03544	0.78859	0.773769
ENSG00000196912	10	9.63236	9.65798	9.60584	0.823541	0.72587
ENSG00000179750	10	4.7945	4.81073	4.81392	0.830641	0.977175
ENSG00000144188	10	4.02033	4.00033	4.01013	0.83854	0.948996
ENSG00000015568	10	9.09291	9.07522	9.11859	0.840752	0.721883
ENSG00000166013	10	3.0952	3.07616	3.0029	0.843901	0.559755
ENSG00000181126	10	6.07474	6.0885	6.10806	0.861216	0.857102
ENSG00000215483	10	4.64875	4.63578	4.65131	0.867128	0.889347
ENSG00000206032	10	5.33227	5.31615	5.30286	0.876634	0.929525
ENSG00000204293	10	3.46174	3.44683	3.38058	0.879413	0.57192
ENSG00000215065	10	8.10792	8.12017	8.07943	0.882747	0.721789
ENSG00000215863	10	4.62395	4.63606	4.61622	0.886445	0.849897
ENSG00000134297	10	7.16899	7.17476	7.29753	0.93977	0.158907
ENSG00000198021	10	4.54745	4.55366	4.51427	0.94279	0.749396
ENSG00000181524	10	9.82305	9.81395	9.75224	0.954947	0.783629
ENSG00000183629	10	5.27512	5.27238	5.22975	0.956904	0.500527
ENSG00000184227	10	6.99355	6.99541	6.94576	0.974477	0.520373
ENSG00000197848	10	3.91989	3.92816	3.90548	0.977709	0.952087
ENSG00000185182	10	5.62817	5.62732	5.59521	0.986128	0.588536
ENSG00000187951	10	6.34218	6.34343	6.52929	0.994666	0.397832
ENSG00000197575	10	5.33272	5.33322	5.29769	0.995939	0.814269
ENSG00000161133	9	5.09985	6.14842	5.04049	9.30049e-23	5.55591e-16
ENSG00000182890	9	9.29592	9.96018	9.29113	4.86643e-15	9.40362e-08
ENSG00000187630	9	6.8556	7.16639	6.87361	2.52807e-12	4.89257e-06
ENSG00000198075	9	4.62625	5.5964	4.75419	5.49627e-12	1.44539e-05
ENSG00000180178	9	4.59972	4.92189	4.64119	5.64638e-09	0.000126172
ENSG00000205364	9	6.63453	6.99346	6.68697	1.17876e-08	9.73732e-05
ENSG00000197124	9	7.23353	6.71707	7.21639	3.69975e-08	7.45715e-05
ENSG00000160229	9	7.63906	7.23465	7.70001	1.07716e-07	9.54293e-06
ENSG00000189375	9	6.00481	5.64408	5.90901	1.96999e-07	0.00373401
ENSG00000132958	9	4.15606	3.91668	4.08587	2.71914e-07	0.00245675
ENSG00000187984	9	5.78192	6.38067	5.56929	4.2466e-07	8.90917e-08
ENSG00000167562	9	7.11135	6.84303	7.1219	5.49557e-07	8.65331e-05
ENSG00000168930	9	3.86705	4.37375	3.86065	5.68127e-07	0.00114328
ENSG00000122728	9	6.04883	5.85661	6.0369	1.99285e-06	0.000529414
ENSG00000125144	9	5.61671	5.88792	5.60116	2.98217e-06	0.000260303
ENSG00000197511	9	6.99426	6.44576	7.19925	3.21665e-06	1.4211e-07
ENSG00000204716	9	4.67203	5.20207	4.48824	4.90812e-06	7.07676e-07
ENSG00000204717	9	4.33496	4.7286	4.20671	2.22221e-05	1.41623e-05
ENSG00000186162	9	7.03866	7.24116	7.04181	2.61792e-05	0.000658267
ENSG00000205019	9	7.91192	7.63011	7.88098	3.55748e-05	0.00592355
ENSG00000169402	9	4.59978	5.06707	4.55601	6.03784e-05	0.00703689
ENSG00000215887	9	6.10623	5.84438	6.08121	8.0344e-05	0.00461969
ENSG00000205141	9	5.19167	4.83725	5.14713	0.000120175	0.00776602
ENSG00000178935	9	5.31492	5.04282	5.24624	0.00018984	0.0168821
ENSG00000189136	9	7.64258	7.34928	7.62048	0.000192225	0.0128847
ENSG00000197549	9	4.87996	4.61491	4.83062	0.000194245	0.019855
ENSG00000206193	9	6.6474	6.92652	6.61961	0.000215994	0.00148353
ENSG00000159882	9	5.4706	5.27509	5.45866	0.000220565	0.0137378
ENSG00000213957	9	7.64149	7.4247	7.65259	0.000266057	0.00253454
ENSG00000121388	9	4.77277	4.55933	4.76456	0.000411958	0.00902395
ENSG00000188155	9	6.0948	5.82811	6.11469	0.000509227	0.00668136
ENSG00000215210	9	5.57188	5.35763	5.49718	0.000533957	0.094827
ENSG00000204894	9	5.92657	6.32441	5.92336	0.000552374	0.0127534
ENSG00000143185	9	4.42351	4.13653	4.43053	0.000579858	0.0123074
ENSG00000168937	9	7.05019	6.81077	7.04989	0.00058967	0.00347843
ENSG00000205449	9	5.08306	4.87419	5.13301	0.000615112	0.000793105
ENSG00000167232	9	9.7875	9.47156	9.78098	0.000802533	0.00564779
ENSG00000205181	9	6.93546	6.7118	7.09946	0.000813133	1.16058e-06
ENSG00000105694	9	3.83164	3.54673	3.87356	0.000832128	0.00343292
ENSG00000204789	9	5.45448	5.8489	5.45212	0.000855188	0.0203723
ENSG00000197369	9	6.73771	6.47348	6.75856	0.000868894	0.00616437
ENSG00000203825	9	8.29904	8.04145	8.15852	0.000888084	0.245987
ENSG00000178605	9	7.25531	7.11247	7.24215	0.00104101	0.0368443
ENSG00000212722	9	6.45488	6.17602	6.49024	0.00114394	0.00747644
ENSG00000146757	9	6.82048	6.56027	6.84264	0.00135541	0.00696063
ENSG00000080910	9	4.10272	4.31978	4.12047	0.00142257	0.05572
ENSG00000198670	9	6.09479	6.62075	6.0324	0.00155461	0.0098917
ENSG00000186842	9	5.93701	5.759	5.87475	0.00178033	0.15914
ENSG00000130612	9	4.50663	4.28408	4.49123	0.00180495	0.0406064
ENSG00000198681	9	5.11041	4.90272	5.0986	0.00182494	0.0193531
ENSG00000215568	9	6.27369	6.05488	6.27787	0.00241319	0.0209263
ENSG00000146722	9	5.34907	5.10899	5.37831	0.00253257	0.0146443
ENSG00000178809	9	6.5311	6.3488	6.49462	0.00272376	0.0652003
ENSG00000188447	9	6.2935	6.06957	6.30167	0.00286065	0.0174939
ENSG00000176253	9	4.1716	3.94152	4.08844	0.00311	0.142622
ENSG00000182814	9	5.24038	5.02971	5.25217	0.00311989	0.0242643
ENSG00000215525	9	3.58021	3.94955	3.41784	0.00325475	0.000409037
ENSG00000181450	9	6.29185	6.06517	6.33751	0.00334362	0.00576869
ENSG00000197463	9	5.38351	5.12952	5.38166	0.00349673	0.0359283
ENSG00000172963	9	5.02826	4.8185	5.00511	0.00399681	0.0376989
ENSG00000206192	9	4.12741	4.57612	3.90999	0.00413209	0.000462091
ENSG00000196109	9	4.4663	4.31	4.47768	0.00422616	0.0200279
ENSG00000186562	9	4.6457	4.35762	4.68754	0.00463066	0.0165937
ENSG00000156009	9	6.73197	6.4877	6.73379	0.00504173	0.0416813
ENSG00000198284	9	6.14386	5.96083	6.16427	0.00510085	0.0207442
ENSG00000206066	9	6.92973	6.73961	6.92926	0.00600353	0.0430816
ENSG00000080947	9	6.93794	6.82811	6.88938	0.00601071	0.240678
ENSG00000177599	9	5.86125	5.65871	5.80485	0.00664422	0.202714
ENSG00000214433	9	6.41516	6.25716	6.37449	0.00683467	0.120548
ENSG00000124334	9	6.14226	5.94634	6.11005	0.00723316	0.108734
ENSG00000105750	9	7.62446	7.47265	7.63997	0.00730457	0.0293057
ENSG00000213030	9	6.00908	5.79745	5.93233	0.00786558	0.196337
ENSG00000215285	9	6.36874	6.14039	6.32088	0.00797377	0.123263
ENSG00000189269	9	4.9443	4.78174	4.98382	0.00826927	0.0105762
ENSG00000204941	9	4.70098	4.50572	4.67689	0.00837062	0.101481
ENSG00000126657	9	5.7137	5.4553	5.65468	0.00847117	0.103465
ENSG00000196527	9	8.53966	8.33679	8.50397	0.00885287	0.0880925
ENSG00000214394	9	5.99412	5.83147	5.9712	0.00895015	0.118222
ENSG00000188558	9	4.49327	4.22964	4.46449	0.00967468	0.0602275
ENSG00000162727	9	4.22512	4.57682	4.12146	0.0111212	0.0143319
ENSG00000206448	9	6.96742	6.75224	6.92182	0.0113981	0.174607
ENSG00000189357	9	4.11543	3.93472	4.09225	0.0114692	0.0891821
ENSG00000204532	9	5.38228	5.21522	5.37898	0.0122834	0.0646897
ENSG00000214922	9	4.98212	4.81725	4.98002	0.0126526	0.0913706
ENSG00000214264	9	3.69911	3.92675	3.687	0.0127635	0.0468378
ENSG00000197918	9	3.35007	3.12986	3.28589	0.013555	0.177051
ENSG00000214860	9	6.35761	6.20559	6.3423	0.0138381	0.11431
ENSG00000213967	9	5.171	5.00663	5.18626	0.0139056	0.0408464
ENSG00000196645	9	5.24528	4.8907	5.18181	0.0146543	0.103702
ENSG00000188000	9	4.88994	4.59581	4.84938	0.0155306	0.0922505
ENSG00000176797	9	4.97486	4.78217	4.98873	0.015696	0.0575588
ENSG00000187928	9	7.22412	7.05744	7.23878	0.0159923	0.0718444
ENSG00000212978	9	5.71226	6.10909	5.62831	0.0175484	0.0256467
ENSG00000215105	9	8.1237	7.97228	8.16567	0.0176893	0.0170307
ENSG00000127507	9	5.66516	5.50549	5.65487	0.0183207	0.106807
ENSG00000155622	9	5.57544	5.40117	5.51607	0.0203468	0.224364
ENSG00000122376	9	6.35541	6.20125	6.44756	0.0204039	0.00365697
ENSG00000159289	9	4.69075	4.56219	4.65157	0.0211023	0.241736
ENSG00000187979	9	4.59206	4.43031	4.54833	0.0220527	0.170901
ENSG00000215115	9	4.71272	4.52035	4.62769	0.0250116	0.357491
ENSG00000197172	9	5.58329	5.42488	5.54746	0.0262106	0.172381
ENSG00000215186	9	5.45987	5.32642	5.44904	0.0265921	0.125998
ENSG00000204527	9	3.6436	3.42862	3.60143	0.0285839	0.157709
ENSG00000213401	9	5.61347	5.41113	5.58051	0.0287345	0.195054
ENSG00000105205	9	4.29249	4.1232	4.23301	0.0312206	0.278341
ENSG00000120235	9	4.77242	4.5624	4.79588	0.0312391	0.0570978
ENSG00000118620	9	6.75063	6.56114	6.75441	0.0345738	0.113141
ENSG00000197888	9	2.93792	2.79867	2.9261	0.0352479	0.141609
ENSG00000183519	9	7.6907	7.58214	7.68569	0.0379259	0.0955612
ENSG00000214677	9	5.38617	5.18735	5.45526	0.0379936	0.033366
ENSG00000205918	9	8.67102	8.58979	8.6951	0.0385092	0.062255
ENSG00000215074	9	5.04635	5.33397	5.21341	0.0400785	0.486496
ENSG00000214429	9	4.70947	4.51961	4.70298	0.0410462	0.121513
ENSG00000212939	9	6.46446	6.25073	6.3223	0.0416325	0.635118
ENSG00000178287	9	5.06834	4.92976	5.07912	0.0446937	0.117325
ENSG00000215812	9	3.55296	3.37655	3.52449	0.0464994	0.201067
ENSG00000198039	9	7.77329	7.60614	7.84438	0.0471805	0.0258213
ENSG00000197503	9	4.64139	4.46599	4.63426	0.0495183	0.177369
ENSG00000187953	9	7.16193	7.07449	7.15512	0.0504929	0.164422
ENSG00000187919	9	3.99091	3.86641	3.96746	0.0508892	0.253143
ENSG00000169164	9	5.43665	5.225	5.41565	0.0511158	0.188631
ENSG00000184701	9	6.50897	6.36773	6.42168	0.0537393	0.605131
ENSG00000166984	9	5.2905	5.15666	5.23107	0.0576865	0.481605
ENSG00000179172	9	4.73344	4.59734	4.78895	0.0580638	0.0442552
ENSG00000215237	9	5.22849	5.10644	5.26629	0.0593853	0.0381837
ENSG00000204645	9	4.28862	4.14988	4.2686	0.0618023	0.184266
ENSG00000204917	9	4.91795	4.74576	4.96874	0.0636224	0.0799714
ENSG00000214432	9	5.33417	5.13384	5.34188	0.0645592	0.146847
ENSG00000204113	9	6.3295	6.21193	6.29167	0.0646109	0.379331
ENSG00000214888	9	5.91929	5.76719	5.96015	0.0651616	0.0591512
ENSG00000189090	9	6.94911	6.79316	6.93125	0.0661647	0.226474
ENSG00000188683	9	4.63913	4.49263	4.61623	0.0671215	0.252844
ENSG00000215127	9	6.3417	6.22407	6.29743	0.0674171	0.39656
ENSG00000215117	9	4.87835	4.7453	4.90747	0.0716515	0.132318
ENSG00000215864	9	4.18989	4.08131	4.19418	0.0720923	0.164751
ENSG00000172647	9	5.33835	5.20548	5.29456	0.0754069	0.402646
ENSG00000204455	9	3.93339	3.80568	3.8933	0.0768776	0.370174
ENSG00000171295	9	6.61453	6.50976	6.64669	0.077118	0.0681007
ENSG00000172000	9	4.8094	4.68252	4.78308	0.0776968	0.28226
ENSG00000204660	9	5.16685	5.00794	5.22366	0.0843886	0.090732
ENSG00000167141	9	6.5529	6.42869	6.54175	0.0849066	0.277088
ENSG00000205767	9	4.06071	3.7992	4.1275	0.0879738	0.0720242
ENSG00000130656	9	4.07682	4.23781	4.15638	0.0894315	0.532623
ENSG00000214700	9	4.89767	4.72821	4.80684	0.0913514	0.528002
ENSG00000172250	9	6.00228	5.90172	5.78782	0.0920183	0.08253
ENSG00000215343	9	4.14073	4.04147	4.12502	0.0935715	0.312863
ENSG00000197185	9	3.42104	3.16381	3.29956	0.093602	0.491557
ENSG00000212789	9	8.6454	8.76839	8.64306	0.0936263	0.175276
ENSG00000188624	9	5.18044	5.02776	5.14711	0.0980096	0.366459
ENSG00000197123	9	4.59602	4.46209	4.6078	0.0987402	0.205112
ENSG00000145965	9	2.96969	2.81883	2.92393	0.0988846	0.333381
ENSG00000204177	9	8.01385	7.92399	8.03325	0.104346	0.161213
ENSG00000196337	9	6.18167	6.04421	6.15252	0.111965	0.39064
ENSG00000198153	9	9.38472	9.25685	9.50932	0.116366	0.0194924
ENSG00000197385	9	6.71647	6.53657	6.60745	0.117492	0.663281
ENSG00000197258	9	7.57216	7.31429	7.42988	0.118828	0.597285
ENSG00000182397	9	6.89101	6.76802	6.95754	0.127424	0.0563572
ENSG00000203781	9	4.3545	4.17498	4.43003	0.12806	0.0955408
ENSG00000133375	9	5.21657	5.07701	5.27009	0.130545	0.113678
ENSG00000187451	9	8.75644	8.95101	8.78024	0.131069	0.319204
ENSG00000179938	9	6.32045	6.39684	6.33331	0.131316	0.33978
ENSG00000101812	9	5.29672	5.18659	5.26598	0.131882	0.424128
ENSG00000214256	9	8.28897	8.1768	8.21683	0.140338	0.71137
ENSG00000182625	9	6.12769	6.21365	6.16845	0.149783	0.590823
ENSG00000214702	9	6.26222	6.16612	6.24462	0.151372	0.388662
ENSG00000214564	9	6.3941	6.33371	6.35663	0.163075	0.703704
ENSG00000171711	9	4.67717	4.52517	4.6821	0.173527	0.291106
ENSG00000205045	9	4.6541	4.73801	4.61732	0.177302	0.159001
ENSG00000101278	9	8.30958	8.19174	8.31757	0.177685	0.315526
ENSG00000197364	9	4.07392	3.92453	4.12191	0.178749	0.17716
ENSG00000214100	9	3.1578	3.29743	3.11579	0.179364	0.208223
ENSG00000177738	9	4.67811	4.58275	4.74124	0.180904	0.0935799
ENSG00000198033	9	6.67881	6.60701	6.64598	0.188864	0.638396
ENSG00000187721	9	4.29218	4.17378	4.19826	0.191829	0.843022
ENSG00000168967	9	3.81582	3.65389	3.89219	0.195544	0.16414
ENSG00000157965	9	4.5114	4.41037	4.46796	0.195673	0.611839
ENSG00000183022	9	7.46224	7.37754	7.46409	0.199178	0.308012
ENSG00000089012	9	5.35785	5.26221	5.35906	0.205178	0.328029
ENSG00000184525	9	7.71069	7.79553	7.71817	0.213545	0.36283
ENSG00000183647	9	5.95928	5.88994	5.95177	0.21387	0.416279
ENSG00000182378	9	7.59942	7.52934	7.57146	0.22513	0.656092
ENSG00000178150	9	5.74885	5.86172	6.08534	0.225553	0.0219333
ENSG00000159885	9	5.96836	5.89132	6.01331	0.234455	0.196687
ENSG00000189089	9	4.87311	4.78344	4.91033	0.234701	0.235544
ENSG00000171936	9	4.34659	4.17955	4.43498	0.251164	0.176886
ENSG00000205281	9	6.4462	6.3383	6.3901	0.252794	0.69994
ENSG00000205100	9	7.16243	7.23615	7.24209	0.266637	0.948925
ENSG00000185986	9	9.33459	9.28702	9.32957	0.288302	0.459291
ENSG00000188171	9	7.88503	7.81075	7.95347	0.290591	0.100683
ENSG00000135226	9	3.57516	3.50382	3.54009	0.297044	0.705702
ENSG00000167383	9	7.00667	7.06715	7.0621	0.302118	0.956929
ENSG00000184785	9	6.65121	6.75285	6.66222	0.32961	0.555082
ENSG00000214298	9	6.49645	6.38121	6.47215	0.335323	0.542114
ENSG00000213799	9	6.84129	6.76109	6.93326	0.336225	0.0682507
ENSG00000196466	9	6.26203	6.17588	6.27184	0.342348	0.455648
ENSG00000108452	9	3.56498	3.42909	3.46742	0.342651	0.834355
ENSG00000176782	9	4.02179	3.9301	3.96975	0.343095	0.777017
ENSG00000196861	9	2.98999	2.84994	2.80223	0.347895	0.795684
ENSG00000178606	9	8.09123	7.98548	8.24171	0.357551	0.065748
ENSG00000205649	9	3.40266	3.3205	3.37766	0.381301	0.643991
ENSG00000214424	9	5.97046	6.01785	6.00745	0.407271	0.895428
ENSG00000196395	9	4.98496	4.88984	4.95856	0.413343	0.658905
ENSG00000166351	9	3.3753	3.32826	3.32497	0.453205	0.97238
ENSG00000189306	9	7.8902	7.9277	7.80533	0.472743	0.042199
ENSG00000198346	9	6.02697	5.97984	6.15895	0.490308	0.0315686
ENSG00000214760	9	6.21634	6.08558	6.24096	0.495162	0.575838
ENSG00000196922	9	6.89467	6.95647	7.05117	0.50302	0.415428
ENSG00000214252	9	4.91887	4.84856	4.89108	0.51646	0.774558
ENSG00000127589	9	8.02725	7.99814	8.02719	0.517807	0.63671
ENSG00000134365	9	3.41844	3.37869	3.41764	0.525255	0.680367
ENSG00000187909	9	3.11732	3.32795	2.93422	0.530569	0.38223
ENSG00000128250	9	5.97223	5.9262	5.85259	0.538379	0.43743
ENSG00000175676	9	5.1383	5.1091	5.10084	0.545891	0.90144
ENSG00000133519	9	7.34599	7.38764	7.22126	0.558145	0.0897094
ENSG00000185904	9	6.17345	6.13019	6.21636	0.575257	0.417031
ENSG00000183850	9	5.59075	5.53755	5.67817	0.577481	0.264682
ENSG00000215154	9	8.2616	8.23212	8.27015	0.594766	0.625107
ENSG00000196686	9	2.29767	2.23217	2.20992	0.59604	0.895912
ENSG00000198904	9	5.56763	5.53554	5.56231	0.597281	0.755573
ENSG00000196604	9	3.50564	3.53264	3.49714	0.611969	0.641841
ENSG00000186579	9	3.34027	3.37845	3.26871	0.612976	0.240922
ENSG00000196757	9	6.87787	6.84481	6.862	0.613472	0.851236
ENSG00000172746	9	5.42383	5.46963	5.42574	0.615801	0.744077
ENSG00000177350	9	6.59301	6.55019	6.59971	0.618946	0.699847
ENSG00000186777	9	4.21983	4.1438	4.19798	0.619605	0.801625
ENSG00000214646	9	5.95785	5.92858	5.95112	0.632467	0.783604
ENSG00000183514	9	4.77281	4.8243	4.76489	0.692739	0.71143
ENSG00000159247	9	8.37987	8.3989	8.35948	0.707843	0.557396
ENSG00000215464	9	7.44958	7.41413	7.45108	0.711152	0.803194
ENSG00000196350	9	3.78941	3.81114	3.82088	0.749003	0.921528
ENSG00000141437	9	4.99312	5.01464	5.01605	0.757136	0.987743
ENSG00000185319	9	3.16324	3.12548	3.16666	0.767972	0.795855
ENSG00000203914	9	5.20063	5.18519	5.22078	0.776458	0.584513
ENSG00000146574	9	8.38828	8.36555	8.3973	0.783751	0.785161
ENSG00000060303	9	5.6658	5.64287	5.60227	0.78845	0.732338
ENSG00000163046	9	5.7732	5.79266	5.71285	0.867709	0.59979
ENSG00000167766	9	7.08544	7.10303	7.15687	0.877939	0.731199
ENSG00000176433	9	4.09692	4.07335	4.07167	0.880586	0.99256
ENSG00000174715	9	8.64896	8.64041	8.72379	0.891822	0.289714
ENSG00000188459	9	5.93153	5.93855	5.94735	0.902458	0.919062
ENSG00000144006	9	9.37877	9.37542	9.30037	0.980621	0.659346
ENSG00000169715	8	6.23147	6.97472	6.25051	8.9377e-22	8.32358e-13
ENSG00000143226	8	4.4723	5.10858	4.54101	3.1111e-12	4.66443e-06
ENSG00000157326	8	6.46918	6.75541	6.4998	3.3818e-09	9.99268e-05
ENSG00000206100	8	6.26852	5.4392	6.16057	5.98906e-09	3.36916e-05
ENSG00000130544	8	7.32953	7.06213	7.37006	7.00275e-09	2.96247e-06
ENSG00000005801	8	7.75842	7.45431	7.78286	1.12173e-08	6.07669e-06
ENSG00000205275	8	7.6039	7.1532	7.51137	1.475e-08	0.00018508
ENSG00000196690	8	6.3402	5.52141	6.61434	1.64611e-08	2.19196e-09
ENSG00000181381	8	4.11542	4.60254	4.17051	1.82656e-08	0.000260396
ENSG00000183929	8	7.06114	6.24196	6.8985	2.91583e-08	0.00102264
ENSG00000135747	8	7.42944	6.92937	7.45613	6.74282e-08	2.47396e-05
ENSG00000131797	8	6.58818	6.30342	6.57745	1.16785e-07	0.000212855
ENSG00000215264	8	6.42479	6.01342	6.41622	2.87194e-07	0.000144242
ENSG00000181977	8	8.05003	7.55315	7.94363	1.17628e-06	0.00229314
ENSG00000110900	8	7.74159	8.0987	7.65751	1.24035e-06	1.56106e-05
ENSG00000205856	8	5.6794	6.3627	5.5946	1.39392e-06	0.000644022
ENSG00000213793	8	6.52033	6.25059	6.58408	1.71418e-06	7.38352e-06
ENSG00000205276	8	8.75474	8.50352	8.68123	2.63135e-06	0.0126427
ENSG00000160352	8	7.76156	7.43293	7.80284	2.97991e-06	6.55729e-05
ENSG00000205527	8	5.55782	5.32605	5.49777	3.1365e-06	0.00572168
ENSG00000151846	8	7.42343	7.24234	7.38471	3.25376e-06	0.00863448
ENSG00000181896	8	6.65984	6.438	6.65844	4.03289e-06	0.000554659
ENSG00000214049	8	5.06369	4.7743	5.01162	7.59032e-06	0.0071119
ENSG00000197961	8	8.03715	7.74865	8.04696	8.16144e-06	0.000795896
ENSG00000204611	8	7.75713	7.4733	7.72063	1.70919e-05	0.00391741
ENSG00000173262	8	6.64422	6.43288	6.73311	4.29748e-05	1.40833e-05
ENSG00000196705	8	6.76775	6.46916	6.84089	4.29748e-05	6.18273e-05
ENSG00000010438	8	5.42005	5.75441	5.38702	5.96225e-05	0.00117892
ENSG00000181626	8	3.6076	3.41058	3.52783	6.79726e-05	0.0840757
ENSG00000188388	8	7.5701	7.31286	7.47107	8.59592e-05	0.047755
ENSG00000213297	8	6.93364	6.66791	6.94221	9.52554e-05	0.00458092
ENSG00000205361	8	7.1936	7.37332	7.20078	0.000156942	0.00213417
ENSG00000213988	8	7.57956	7.23153	7.6934	0.000202552	0.000137571
ENSG00000089335	8	9.05349	8.76936	9.12074	0.000228989	0.000403954
ENSG00000187268	8	4.41924	4.18412	4.36281	0.000260515	0.0346786
ENSG00000181433	8	3.76464	3.56043	3.74803	0.00034163	0.0170685
ENSG00000169921	8	4.77257	4.54172	4.82965	0.000531541	0.000884404
ENSG00000180714	8	5.13808	4.87204	5.09055	0.000581534	0.0425801
ENSG00000182141	8	7.0964	6.80208	7.15462	0.000638507	0.00154832
ENSG00000170827	8	6.60551	6.31074	6.56274	0.000653966	0.0196511
ENSG00000198526	8	5.12105	4.96224	5.1061	0.000896702	0.0255076
ENSG00000182632	8	3.52085	3.35553	3.52906	0.000933704	0.00589574
ENSG00000212121	8	5.33071	5.08208	5.37345	0.00097745	0.00618576
ENSG00000176566	8	5.1614	4.9234	5.12291	0.00125668	0.0624936
ENSG00000215573	8	5.78803	5.64528	5.75744	0.00142194	0.0799923
ENSG00000187758	8	5.14861	4.91477	5.17596	0.00172781	0.0121027
ENSG00000213453	8	9.62133	9.98628	9.58603	0.00193166	0.011754
ENSG00000197479	8	7.89135	7.69789	7.91185	0.00196169	0.0182704
ENSG00000215378	8	5.31293	5.05079	5.35055	0.00199004	0.00487794
ENSG00000122852	8	5.87361	5.60735	5.89154	0.00242154	0.0126963
ENSG00000101435	8	5.26395	5.04652	5.25975	0.00251378	0.0264374
ENSG00000132517	8	6.4273	6.21324	6.43345	0.00263363	0.0263873
ENSG00000142511	8	4.93161	4.69509	4.8858	0.00285351	0.0550111
ENSG00000186115	8	5.1145	4.87579	5.08732	0.00290218	0.0491981
ENSG00000187156	8	4.47216	4.24769	4.39139	0.00297586	0.138408
ENSG00000197020	8	5.89864	5.62742	6.015	0.00306308	0.000462091
ENSG00000132010	8	5.71173	5.47113	5.66655	0.00313958	0.0733548
ENSG00000205171	8	3.53382	3.3423	3.51034	0.00320776	0.027888
ENSG00000164816	8	5.95662	5.6788	5.93225	0.0032322	0.0423949
ENSG00000204636	8	6.89313	6.4864	6.92876	0.00341887	0.0105279
ENSG00000205396	8	4.86803	4.59887	4.84886	0.00357969	0.0395377
ENSG00000215276	8	4.9154	4.68988	4.83694	0.00357969	0.163826
ENSG00000214869	8	6.46951	6.30636	6.48318	0.00377375	0.0250563
ENSG00000213096	8	8.73565	8.5244	8.73495	0.0046097	0.015853
ENSG00000155319	8	3.56142	3.4115	3.52173	0.00494424	0.109661
ENSG00000176075	8	4.92007	4.61515	4.90964	0.00498936	0.0360219
ENSG00000128438	8	5.94931	5.74904	5.92436	0.005056	0.0907037
ENSG00000124435	8	4.13823	3.90677	4.11296	0.00540424	0.0665349
ENSG00000205238	8	5.20222	5.01389	5.14962	0.00601412	0.1329
ENSG00000214578	8	5.7385	5.17156	5.67935	0.00627952	0.0584144
ENSG00000155495	8	4.80685	4.56834	4.77778	0.00627952	0.0859959
ENSG00000173041	8	6.53719	6.2418	6.60841	0.00653886	0.010984
ENSG00000178429	8	10.4825	10.2345	10.5161	0.00663142	0.0238001
ENSG00000187372	8	8.6804	8.51379	8.68608	0.00730457	0.0618471
ENSG00000180081	8	7.238	7.07692	7.26615	0.00752441	0.0141369
ENSG00000173124	8	4.61363	4.43523	4.58864	0.00799345	0.0852346
ENSG00000128262	8	6.56779	6.37477	6.55537	0.00857781	0.062864
ENSG00000206344	8	6.26007	6.08831	6.26873	0.0089743	0.0279726
ENSG00000197647	8	6.07094	5.92584	6.03409	0.00908909	0.136957
ENSG00000167195	8	4.90468	4.7494	4.86002	0.0095469	0.178688
ENSG00000167634	8	4.21062	4.00363	4.17058	0.00958264	0.119629
ENSG00000168903	8	5.13944	4.91513	5.14715	0.00969367	0.0572798
ENSG00000166104	8	4.98786	4.82915	4.94245	0.0103155	0.174921
ENSG00000166840	8	4.41041	4.58405	4.30463	0.0103659	0.00125424
ENSG00000215909	8	5.71883	5.44777	5.70751	0.0114615	0.0631645
ENSG00000215009	8	4.89701	4.69923	4.89485	0.011494	0.0709666
ENSG00000184750	8	5.66884	5.47198	5.64252	0.0116409	0.123409
ENSG00000160336	8	7.6803	7.49465	7.76862	0.0118708	0.00279923
ENSG00000196172	8	5.71755	5.50556	5.6495	0.0133907	0.207837
ENSG00000068985	8	4.7778	4.59006	4.74106	0.0135496	0.158907
ENSG00000197870	8	7.16245	6.9308	7.16884	0.0137126	0.0734493
ENSG00000182162	8	4.98387	4.75165	4.91646	0.0143623	0.208845
ENSG00000189372	8	3.56297	3.38052	3.57821	0.0146726	0.0472786
ENSG00000212125	8	7.22405	6.92386	7.2083	0.0164977	0.0995732
ENSG00000204363	8	3.9389	3.74236	3.90427	0.0174981	0.100175
ENSG00000204038	8	5.34339	5.13949	5.32244	0.018699	0.117754
ENSG00000135976	8	7.8838	7.60377	7.84092	0.0200365	0.168962
ENSG00000163374	8	8.35366	8.19514	8.33549	0.0208509	0.149399
ENSG00000165682	8	4.16147	3.97491	4.1496	0.0218128	0.0841026
ENSG00000131127	8	7.7998	7.60103	7.82838	0.0230976	0.0464905
ENSG00000186275	8	8.82909	8.95973	8.8821	0.0240999	0.381339
ENSG00000203684	8	5.79161	5.51962	5.77441	0.024408	0.144301
ENSG00000178386	8	6.81283	6.65069	6.84967	0.0256257	0.0617806
ENSG00000115386	8	4.98522	4.8275	5.00039	0.0264463	0.0608354
ENSG00000151033	8	4.72706	4.55928	4.78634	0.0266825	0.0178697
ENSG00000180071	8	5.56924	5.89934	5.1448	0.0269133	7.18991e-06
ENSG00000188873	8	8.13249	7.81668	8.08472	0.0275755	0.17667
ENSG00000128253	8	6.07166	5.96154	6.00709	0.0276301	0.47986
ENSG00000214639	8	4.94688	4.7906	4.99648	0.028046	0.0379488
ENSG00000179362	8	5.35645	5.2283	5.38207	0.0302196	0.0545573
ENSG00000150276	8	6.15969	6.02424	6.22794	0.0306255	0.0150454
ENSG00000215486	8	3.74436	3.52654	3.69436	0.0308797	0.1774
ENSG00000185947	8	5.29693	5.45081	5.36858	0.0312557	0.424128
ENSG00000006659	8	4.7682	4.99563	4.74951	0.0313675	0.137638
ENSG00000124467	8	4.4353	4.27795	4.39875	0.0313792	0.222145
ENSG00000172967	8	3.56418	3.41783	3.513	0.0317621	0.28582
ENSG00000114547	8	4.34238	4.48895	4.33509	0.0329644	0.0859719
ENSG00000165591	8	5.02672	4.91748	4.99963	0.03374	0.243421
ENSG00000174827	8	4.85876	4.99066	4.85348	0.0344929	0.168488
ENSG00000099977	8	7.14802	7.38114	7.02784	0.0363359	0.0199387
ENSG00000181562	8	3.83912	3.65692	3.81408	0.0387993	0.195533
ENSG00000163016	8	6.1231	6.02346	6.08797	0.0389638	0.312863
ENSG00000180150	8	4.421	4.13802	4.41048	0.0395916	0.1425
ENSG00000197302	8	6.33302	6.48496	6.46476	0.0434562	0.852204
ENSG00000139797	8	5.54403	5.37771	5.55622	0.0451024	0.118542
ENSG00000182376	8	5.47947	5.32056	5.45668	0.046939	0.226374
ENSG00000182583	8	5.05429	4.89647	5.01203	0.0479412	0.290835
ENSG00000186008	8	3.89209	3.70689	3.93552	0.0485489	0.085022
ENSG00000108785	8	6.99382	6.82974	7.00536	0.0500744	0.155308
ENSG00000189162	8	5.80526	5.66576	5.81111	0.0515777	0.167919
ENSG00000215003	8	6.97261	6.84175	6.96458	0.0532381	0.195054
ENSG00000182912	8	6.30343	6.1382	6.25711	0.0546082	0.29407
ENSG00000205360	8	5.16909	4.80998	5.13094	0.0553724	0.163076
ENSG00000160339	8	6.42837	6.27919	6.40953	0.0584803	0.259897
ENSG00000214144	8	4.66145	4.52474	4.58715	0.0594541	0.525646
ENSG00000172232	8	6.39914	6.24785	6.36955	0.0604169	0.285143
ENSG00000182111	8	3.41542	3.29356	3.3734	0.0630308	0.393117
ENSG00000166770	8	8.70592	8.87316	8.76844	0.0642503	0.393223
ENSG00000189186	8	4.71585	4.58584	4.68059	0.0651455	0.349152
ENSG00000172899	8	4.20788	3.96365	4.23591	0.0657976	0.11566
ENSG00000135220	8	3.76864	3.61809	3.7723	0.0659228	0.182929
ENSG00000214843	8	4.83332	4.73614	4.80097	0.0698503	0.353407
ENSG00000159904	8	6.51504	6.40811	6.5643	0.0753197	0.0605395
ENSG00000197721	8	4.52237	4.38734	4.5495	0.0803346	0.149431
ENSG00000197134	8	5.76034	5.5668	5.77804	0.0815929	0.156322
ENSG00000152086	8	6.1253	6.00893	6.14693	0.0868533	0.179886
ENSG00000197372	8	6.55875	6.35514	6.53527	0.0872838	0.257909
ENSG00000197838	8	5.28966	5.16164	5.27581	0.0886454	0.273946
ENSG00000214555	8	4.9121	4.78505	4.90075	0.0886878	0.258576
ENSG00000169668	8	7.71392	7.61224	7.66685	0.0914776	0.557396
ENSG00000178248	8	4.66525	4.53258	4.73565	0.0948528	0.0462508
ENSG00000214759	8	4.08098	3.89126	4.04911	0.102334	0.317312
ENSG00000189326	8	3.50504	3.35571	3.50976	0.103219	0.185515
ENSG00000158639	8	5.29968	5.16549	5.27576	0.103644	0.283168
ENSG00000214890	8	3.51726	3.38777	3.48847	0.107286	0.265791
ENSG00000118903	8	3.70572	3.58221	3.73293	0.110797	0.165681
ENSG00000144199	8	7.43059	7.35525	7.36917	0.113905	0.843142
ENSG00000081665	8	7.62362	7.49013	7.74702	0.113975	0.016429
ENSG00000188605	8	6.20656	6.06626	6.29223	0.114867	0.0368805
ENSG00000214210	8	5.95129	5.79092	6.01191	0.121471	0.114265
ENSG00000148513	8	3.31927	3.25001	3.29215	0.141006	0.514072
ENSG00000105808	8	8.14988	8.28534	8.05329	0.141558	0.0437605
ENSG00000214405	8	4.73487	4.84085	4.74237	0.142665	0.306011
ENSG00000135702	8	5.66276	5.74914	5.63174	0.149055	0.141958
ENSG00000179406	8	5.50408	5.41814	5.52413	0.149646	0.179331
ENSG00000215383	8	6.35552	6.18385	6.34603	0.149831	0.253903
ENSG00000182308	8	4.66656	4.55324	4.69226	0.155942	0.193386
ENSG00000188818	8	6.63254	6.55705	6.61601	0.161476	0.413934
ENSG00000177504	8	5.93407	5.81987	5.86855	0.162651	0.676494
ENSG00000214896	8	5.83226	5.72373	5.84275	0.163345	0.26547
ENSG00000204098	8	6.72167	6.61094	6.62569	0.16362	0.898678
ENSG00000198342	8	5.70829	5.77248	5.73999	0.167622	0.617905
ENSG00000180385	8	5.75246	5.66503	5.71558	0.170993	0.569688
ENSG00000188868	8	4.77644	4.85329	4.7719	0.174238	0.29354
ENSG00000177138	8	3.96666	3.88896	3.93442	0.175146	0.581656
ENSG00000186678	8	3.71225	3.57285	3.67443	0.180461	0.447996
ENSG00000171903	8	4.39145	4.4825	4.38058	0.19607	0.276548
ENSG00000175718	8	4.85246	4.74822	4.82469	0.199539	0.524524
ENSG00000214636	8	6.59576	6.68574	6.54614	0.205275	0.17909
ENSG00000186244	8	5.8778	5.77436	5.80056	0.217445	0.824871
ENSG00000198429	8	8.26418	8.19923	8.32457	0.219868	0.0518694
ENSG00000182965	8	2.73785	2.62068	2.74452	0.23394	0.333935
ENSG00000188863	8	6.3482	6.29769	6.35237	0.234085	0.36283
ENSG00000198155	8	5.38655	5.46913	5.4365	0.243103	0.725708
ENSG00000184100	8	6.96951	7.04342	6.94794	0.245223	0.26701
ENSG00000196427	8	5.08058	5.00398	5.08729	0.263327	0.390347
ENSG00000154898	8	6.62733	6.76264	6.62415	0.265334	0.346764
ENSG00000183673	8	3.93897	3.81214	3.78761	0.272703	0.887045
ENSG00000163735	8	5.80643	5.87779	5.79403	0.289926	0.367746
ENSG00000214635	8	4.96634	4.81806	5.22884	0.293084	0.0181236
ENSG00000186160	8	4.85662	4.91941	4.88008	0.293605	0.669633
ENSG00000206567	8	6.90836	6.83453	6.87694	0.304806	0.671379
ENSG00000182707	8	5.51561	5.39382	5.54327	0.305585	0.332714
ENSG00000170369	8	5.66209	5.74082	5.64677	0.312896	0.38957
ENSG00000183432	8	2.95829	2.86868	2.93236	0.331065	0.641841
ENSG00000188512	8	3.80053	3.89893	3.82152	0.333303	0.560675
ENSG00000189316	8	6.43255	6.36171	6.43291	0.351291	0.511624
ENSG00000214035	8	4.29316	4.23337	4.33389	0.355558	0.269439
ENSG00000105198	8	3.84776	3.93289	3.76571	0.370836	0.209849
ENSG00000214652	8	4.07702	4.02657	4.0826	0.395648	0.479477
ENSG00000205955	8	4.58526	4.52374	4.62862	0.398951	0.258779
ENSG00000204474	8	5.06672	4.95528	4.95019	0.403616	0.977664
ENSG00000187658	8	4.66026	4.5799	4.62134	0.412263	0.7495
ENSG00000215838	8	4.54324	4.48663	4.59458	0.43599	0.277805
ENSG00000212633	8	6.2362	6.16524	6.20239	0.445975	0.793236
ENSG00000205940	8	7.48531	7.43961	7.42307	0.463684	0.862006
ENSG00000198518	8	6.8238	6.916	6.87722	0.464975	0.835856
ENSG00000214810	8	5.59278	5.51684	5.69343	0.472316	0.195671
ENSG00000163736	8	4.59509	4.65015	4.58147	0.473513	0.524944
ENSG00000177688	8	5.947	5.88644	5.94113	0.495973	0.623102
ENSG00000215325	8	4.81613	4.75664	4.72329	0.501501	0.803942
ENSG00000169325	8	8.32962	8.27713	8.32799	0.514071	0.613372
ENSG00000122872	8	5.46301	5.39469	5.19837	0.528604	0.149431
ENSG00000189093	8	7.56666	7.52268	7.50812	0.534387	0.881781
ENSG00000215093	8	8.21151	8.26397	8.26949	0.550794	0.965681
ENSG00000179571	8	9.47146	9.50514	9.51612	0.578464	0.911535
ENSG00000189332	8	6.03324	6.00787	6.00371	0.579342	0.952023
ENSG00000018607	8	6.716	6.67676	6.78027	0.631413	0.325624
ENSG00000183355	8	5.47693	5.43175	5.45454	0.631614	0.870535
ENSG00000204920	8	6.23792	6.21159	6.27648	0.655453	0.397186
ENSG00000213803	8	4.48262	4.56867	4.59722	0.656192	0.909515
ENSG00000128394	8	4.64268	4.67173	4.64106	0.66124	0.73515
ENSG00000180458	8	5.7082	5.73515	5.66482	0.676246	0.449558
ENSG00000189132	8	4.85993	4.82223	4.89258	0.679053	0.554252
ENSG00000215068	8	5.01609	4.98408	5.05318	0.683889	0.532789
ENSG00000125385	8	8.69857	8.66046	8.67231	0.686144	0.935949
ENSG00000174408	8	5.0862	5.12964	5.11747	0.687834	0.930991
ENSG00000198738	8	4.13645	4.09075	4.05369	0.694791	0.806911
ENSG00000180662	8	4.74876	4.71141	4.7052	0.709344	0.965836
ENSG00000124549	8	5.78378	5.76593	5.84581	0.730553	0.188646
ENSG00000205333	8	4.61176	4.56204	4.61384	0.733175	0.764955
ENSG00000196081	8	8.0276	7.99746	8.07066	0.747152	0.559268
ENSG00000177770	8	6.39551	6.41674	6.41672	0.758335	0.999803
ENSG00000213973	8	4.85366	4.87289	4.91274	0.795296	0.66875
ENSG00000197360	8	5.0601	5.03445	5.02567	0.799317	0.946518
ENSG00000198633	8	7.86461	7.87741	7.88658	0.799652	0.89737
ENSG00000171989	8	4.53356	4.51054	4.46868	0.800952	0.716753
ENSG00000129450	8	6.01191	6.03096	6.02056	0.802901	0.91919
ENSG00000215467	8	7.41384	7.39268	7.35132	0.812209	0.733469
ENSG00000185684	8	6.20979	6.20122	6.19901	0.856715	0.973244
ENSG00000197013	8	6.35068	6.36846	6.3822	0.860069	0.917394
ENSG00000205794	8	5.91337	5.89632	5.8544	0.863117	0.77445
ENSG00000215096	8	4.09845	4.11748	4.02411	0.876168	0.537919
ENSG00000204860	8	7.05309	7.0388	7.00965	0.898331	0.855288
ENSG00000163737	8	5.7844	5.77467	5.74423	0.909799	0.790135
ENSG00000120853	8	5.54825	5.54265	5.53649	0.930975	0.942697
ENSG00000102128	8	6.20441	6.20818	6.183	0.940915	0.726042
ENSG00000197933	8	6.45767	6.4557	6.64159	0.980235	0.0302563
ENSG00000204121	8	4.97446	4.97176	4.91916	0.988327	0.833705
ENSG00000204592	7	7.11085	7.79606	7.14702	5.79452e-17	1.61761e-08
ENSG00000205358	7	5.87913	6.34734	5.89552	1.07977e-12	9.32499e-08
ENSG00000162840	7	7.27372	7.70169	7.30315	2.95313e-12	3.77358e-07
ENSG00000130684	7	7.90744	7.33325	7.818	2.12413e-10	9.14461e-06
ENSG00000196418	7	7.99128	7.25492	8.05424	4.81418e-10	1.60461e-07
ENSG00000176289	7	10.1285	10.5106	10.0454	9.22237e-08	1.32646e-06
ENSG00000168384	7	5.18281	5.61087	5.19101	1.13062e-07	0.000142964
ENSG00000162482	7	7.548	7.81454	7.54581	1.38922e-07	0.000100759
ENSG00000183611	7	6.71259	6.46309	6.71757	1.23434e-06	7.50546e-05
ENSG00000188295	7	7.31802	7.065	7.33049	2.48187e-05	0.00130721
ENSG00000178700	7	6.71743	6.47251	6.77543	4.02235e-05	0.000242974
ENSG00000198551	7	8.30235	8.04193	8.38189	4.81492e-05	5.78008e-05
ENSG00000198934	7	7.12356	7.4232	6.99824	0.000117681	9.92452e-05
ENSG00000197044	7	6.51914	6.23974	6.44451	0.000279721	0.0558446
ENSG00000198028	7	4.1877	4.0065	4.22685	0.00033302	0.000734664
ENSG00000171466	7	7.75804	7.55683	7.78033	0.000357496	0.002051
ENSG00000187481	7	4.03245	3.73172	4.05608	0.000444798	0.00688397
ENSG00000189030	7	4.95387	4.68081	4.98192	0.000695785	0.00864485
ENSG00000197608	7	7.90251	7.69146	7.95935	0.000905089	0.00234565
ENSG00000197585	7	4.78305	4.51165	4.70418	0.000925102	0.0637517
ENSG00000180438	7	8.38496	8.17713	8.33697	0.0013065	0.0432529
ENSG00000120211	7	3.30778	3.05898	3.22801	0.00146952	0.0816975
ENSG00000171574	7	7.36061	7.24218	7.37027	0.00175278	0.0120266
ENSG00000198930	7	4.9257	4.65935	4.90993	0.00204469	0.030987
ENSG00000110484	7	4.69304	4.45988	4.6816	0.00217031	0.0250262
ENSG00000007306	7	4.39043	4.16641	4.43043	0.00283369	0.00773079
ENSG00000203924	7	4.44089	4.1799	4.38384	0.00295306	0.100175
ENSG00000180422	7	6.42808	6.24039	6.40734	0.00430117	0.0750967
ENSG00000204510	7	5.99677	5.75683	6.02759	0.00476346	0.0190451
ENSG00000124233	7	3.37178	3.1563	3.3571	0.00476623	0.0440046
ENSG00000177689	7	4.62842	4.38661	4.58788	0.00479482	0.0816975
ENSG00000186086	7	5.46711	5.31077	5.47256	0.00523334	0.0464156
ENSG00000203858	7	4.99774	4.73781	4.98147	0.00538182	0.0816409
ENSG00000180066	7	5.22421	4.95473	5.22877	0.0058017	0.0385552
ENSG00000113303	7	5.15265	4.93633	5.19539	0.00643918	0.0161138
ENSG00000189039	7	6.49378	6.25614	6.51241	0.00864678	0.0289906
ENSG00000171469	7	7.73594	7.57981	7.75282	0.00878468	0.0301299
ENSG00000177675	7	5.61616	5.45651	5.60717	0.00920849	0.0565922
ENSG00000175609	7	4.28649	3.93142	4.31967	0.012743	0.0386199
ENSG00000164556	7	5.51078	5.31257	5.55118	0.012767	0.0353628
ENSG00000167555	7	7.06438	6.94663	7.09212	0.0137947	0.019381
ENSG00000165584	7	4.50271	4.36654	4.4597	0.0159968	0.174593
ENSG00000197588	7	4.47851	4.24675	4.52552	0.0170636	0.0319635
ENSG00000105708	7	6.65282	6.4845	6.69009	0.0171085	0.0261445
ENSG00000126251	7	4.37404	4.12576	4.40885	0.0200935	0.0378633
ENSG00000046774	7	4.64596	4.45153	4.59671	0.0204248	0.182079
ENSG00000170367	7	5.47113	5.316	5.46372	0.0218987	0.114527
ENSG00000196810	7	8.10924	7.95363	8.04806	0.0233522	0.343949
ENSG00000197371	7	4.43204	4.20831	4.42142	0.0245221	0.0697649
ENSG00000215444	7	5.56495	5.08083	5.4945	0.02722	0.156331
ENSG00000187225	7	6.1176	5.90027	6.15315	0.0279236	0.0519517
ENSG00000172912	7	5.6899	5.47992	5.76884	0.0305088	0.0465837
ENSG00000186510	7	6.06998	5.92906	6.11403	0.0361088	0.0490402
ENSG00000184905	7	9.44555	9.58563	9.40965	0.0412952	0.0513548
ENSG00000168703	7	5.23756	5.06293	5.25645	0.0430056	0.103038
ENSG00000205097	7	5.39506	5.25235	5.38088	0.0557229	0.178444
ENSG00000176979	7	4.0322	3.89162	4.01868	0.0570785	0.203814
ENSG00000206042	7	3.87761	3.61462	3.95059	0.0575797	0.0637552
ENSG00000185918	7	4.40766	4.26404	4.40387	0.0594763	0.150054
ENSG00000165583	7	4.3144	4.1887	4.29372	0.0605379	0.275739
ENSG00000215905	7	5.3316	5.18323	5.35193	0.062072	0.0898231
ENSG00000116721	7	3.39755	3.2456	3.35743	0.066765	0.348747
ENSG00000205642	7	5.26382	5.10386	5.18759	0.06752	0.527483
ENSG00000204648	7	4.19519	4.07161	4.16177	0.0784884	0.34712
ENSG00000197042	7	4.40484	4.26108	4.36634	0.0788127	0.354708
ENSG00000144010	7	4.01978	3.86069	4.01129	0.0814573	0.225791
ENSG00000161640	7	6.34641	6.22928	6.33509	0.0820463	0.264538
ENSG00000183304	7	3.435	3.31904	3.38508	0.0934659	0.488938
ENSG00000203859	7	4.36426	4.2116	4.35382	0.0939522	0.278323
ENSG00000165509	7	5.03688	4.90388	5.00026	0.0943183	0.376934
ENSG00000212739	7	3.02847	2.76778	3.0338	0.0971941	0.114897
ENSG00000102069	7	5.02281	5.12588	5.03721	0.0973665	0.316782
ENSG00000160862	7	5.72989	5.59811	5.72654	0.098847	0.262855
ENSG00000180869	7	5.0312	4.89031	5.04399	0.0991106	0.19484
ENSG00000205853	7	5.5939	5.48682	5.51303	0.102646	0.766684
ENSG00000187223	7	5.96777	5.82325	6.00129	0.103745	0.144505
ENSG00000185044	7	6.85453	6.96898	6.83485	0.105099	0.180543
ENSG00000165059	7	5.56212	5.42959	5.54558	0.11641	0.324751
ENSG00000086548	7	4.14355	4.02834	4.11499	0.117286	0.388329
ENSG00000118990	7	5.36083	5.22543	5.47236	0.123929	0.0281283
ENSG00000176401	7	8.03607	8.13443	8.04429	0.131866	0.317994
ENSG00000188029	7	4.61648	4.52587	4.64936	0.144653	0.136079
ENSG00000188474	7	4.89834	4.98888	4.97362	0.166373	0.877104
ENSG00000164821	7	4.47452	4.35966	4.5304	0.174861	0.0983671
ENSG00000214908	7	4.73897	4.60471	4.83414	0.179808	0.0721464
ENSG00000109181	7	3.56694	3.47604	3.5577	0.2038	0.408504
ENSG00000178107	7	3.55975	3.42663	3.48842	0.213477	0.690481
ENSG00000181097	7	5.10281	4.98088	5.1763	0.219787	0.097757
ENSG00000172774	7	3.71641	3.58881	3.74675	0.227056	0.218618
ENSG00000197714	7	9.75764	9.70736	9.77605	0.230203	0.208031
ENSG00000188877	7	3.06579	3.00351	3.04368	0.280192	0.607304
ENSG00000214197	7	5.61809	5.53532	5.69081	0.286158	0.0978651
ENSG00000182586	7	5.73127	5.63045	5.67647	0.296522	0.735219
ENSG00000203855	7	5.83979	5.59066	5.82362	0.301506	0.484378
ENSG00000203983	7	5.90102	5.79069	5.86627	0.311261	0.636906
ENSG00000214657	7	5.10589	5.01133	5.10688	0.314232	0.467419
ENSG00000187474	7	4.01705	3.95352	4.02394	0.357959	0.389721
ENSG00000169397	7	4.65497	4.56215	4.6637	0.370356	0.493027
ENSG00000205277	7	5.48962	5.39114	5.58248	0.399856	0.216652
ENSG00000169955	7	7.93944	7.87727	7.93803	0.404691	0.576109
ENSG00000130818	7	6.70067	6.75941	6.76497	0.417583	0.960607
ENSG00000204397	7	3.69001	3.75499	3.57458	0.501776	0.0954875
ENSG00000215110	7	3.65711	3.60626	3.71035	0.541693	0.340386
ENSG00000167393	7	6.59838	6.55628	6.57712	0.579809	0.862689
ENSG00000130383	7	6.40301	6.35104	6.41752	0.595822	0.633031
ENSG00000206047	7	4.22563	4.18576	4.23795	0.663977	0.656729
ENSG00000173110	7	6.45087	6.42367	6.46018	0.67499	0.687712
ENSG00000128276	7	5.66746	5.63957	5.58148	0.69795	0.502228
ENSG00000204516	7	5.2308	5.26274	5.24306	0.705105	0.877921
ENSG00000180953	7	5.84223	5.81959	5.81756	0.798826	0.986167
ENSG00000196415	7	6.97982	6.9965	6.93135	0.83808	0.563504
ENSG00000214797	7	4.27864	4.29453	4.34822	0.903754	0.745182
ENSG00000197533	7	5.48843	5.49296	5.45316	0.941025	0.561783
ENSG00000212946	7	4.17442	4.17892	4.13827	0.978853	0.841867
ENSG00000142089	6	6.40392	7.10311	6.43121	4.80536e-15	1.67181e-08
ENSG00000150337	6	4.87139	5.71715	4.91242	7.16338e-14	6.97851e-08
ENSG00000196378	6	7.09394	6.79159	7.08235	9.21893e-14	1.86729e-07
ENSG00000168383	6	5.90683	6.42672	5.92401	1.93396e-13	3.00288e-08
ENSG00000174460	6	7.64222	8.82477	7.9077	2.02153e-12	8.37574e-08
ENSG00000172123	6	4.27573	4.70854	4.23773	7.04969e-12	1.69822e-07
ENSG00000182165	6	5.01223	5.3574	5.00649	1.10677e-10	3.12863e-06
ENSG00000179909	6	8.31769	7.94782	8.31193	1.57151e-10	2.49618e-06
ENSG00000204982	6	4.46019	5.08232	4.42707	4.73702e-10	2.91337e-06
ENSG00000165572	6	9.50847	9.22994	9.49569	1.06719e-09	1.71844e-05
ENSG00000186611	6	5.89966	7.02934	5.71155	1.24507e-09	3.40656e-07
ENSG00000159915	6	6.69965	6.34646	6.71501	2.4047e-09	4.27692e-06
ENSG00000178947	6	9.09784	9.48628	9.09699	3.29239e-09	3.3628e-05
ENSG00000205809	6	4.60377	5.13955	4.59894	4.17336e-09	6.18273e-05
ENSG00000204271	6	7.75292	7.48617	7.70103	4.58109e-09	0.000310831
ENSG00000182289	6	5.99019	5.47725	5.84974	7.47268e-09	0.000651668
ENSG00000154760	6	4.29382	4.84124	4.29551	7.83985e-09	0.000107995
ENSG00000204319	6	6.61068	6.99303	6.62278	1.49707e-08	0.000259612
ENSG00000214302	6	7.79517	7.35177	7.74365	6.21558e-08	0.00023474
ENSG00000165948	6	7.01631	7.37871	6.99932	1.57272e-07	6.309e-05
ENSG00000128335	6	5.08487	5.43191	5.09124	1.6493e-07	0.000110483
ENSG00000205704	6	5.94785	6.57174	5.83976	7.50905e-07	2.64532e-05
ENSG00000178338	6	7.01514	6.83078	6.99291	8.55679e-07	0.00074898
ENSG00000212766	6	5.07913	4.69026	5.08564	2.57845e-06	0.000368563
ENSG00000138115	6	4.91928	5.25997	4.90774	3.89537e-06	0.00111358
ENSG00000204345	6	4.84118	4.46175	4.82825	5.32599e-06	0.000873895
ENSG00000081770	6	7.57078	7.16842	7.63978	5.69297e-06	3.28725e-05
ENSG00000176654	6	4.8114	4.48055	4.82376	7.33624e-06	0.000742986
ENSG00000161634	6	5.1181	4.78515	5.09554	8.00066e-06	0.00166185
ENSG00000206105	6	5.51599	5.06228	5.51113	8.90068e-06	0.000538852
ENSG00000177432	6	7.68852	7.9836	7.76457	1.36591e-05	0.0113419
ENSG00000149021	6	6.06853	5.76129	6.03814	6.9717e-05	0.00616704
ENSG00000159496	6	5.70654	5.41834	5.64015	7.91855e-05	0.0376302
ENSG00000197620	6	7.88753	7.73638	7.93433	8.84953e-05	0.000145649
ENSG00000105497	6	6.79394	6.56732	6.80899	9.07386e-05	0.00533868
ENSG00000213366	6	7.63415	8.12879	7.99542	9.56413e-05	0.326476
ENSG00000124260	6	5.18567	4.90662	5.17116	9.8397e-05	0.00657057
ENSG00000121716	6	7.89723	7.70587	7.87797	0.000105012	0.0065571
ENSG00000126952	6	4.29519	4.05948	4.24625	0.000106782	0.0174453
ENSG00000204422	6	6.85538	6.54033	6.84548	0.000127799	0.00672859
ENSG00000189144	6	6.77701	6.58873	6.829	0.00014063	0.000126268
ENSG00000137338	6	6.19296	6.01672	6.22729	0.000159976	0.00101236
ENSG00000204377	6	6.24762	6.64283	6.22601	0.000248819	0.00446253
ENSG00000144026	6	7.05642	6.77578	6.96486	0.000290424	0.0595748
ENSG00000204389	6	8.89676	9.25344	9.0043	0.000377637	0.0716849
ENSG00000175604	6	4.80182	4.49071	4.80382	0.000409114	0.0128679
ENSG00000168367	6	5.6057	5.36147	5.54683	0.000440732	0.0548973
ENSG00000196126	6	4.90381	5.35798	4.94459	0.000442055	0.0237865
ENSG00000188666	6	5.80306	5.41869	5.79333	0.000449404	0.00926486
ENSG00000123584	6	5.98822	5.71165	5.98017	0.000512658	0.0121256
ENSG00000184761	6	5.55296	5.26461	5.61923	0.000554928	0.000980202
ENSG00000204933	6	4.89133	4.54323	4.92033	0.000710531	0.00548151
ENSG00000173572	6	4.34479	4.13173	4.30226	0.000869898	0.0410798
ENSG00000186809	6	3.30352	3.09966	3.24168	0.000877859	0.0714334
ENSG00000136447	6	8.4901	8.19708	8.49268	0.000888084	0.00697218
ENSG00000196826	6	6.93471	6.72007	6.91007	0.000889693	0.0268577
ENSG00000152454	6	7.30536	7.09599	7.34591	0.000938684	0.00820873
ENSG00000185792	6	4.42026	4.16687	4.37869	0.00101507	0.0407339
ENSG00000214040	6	4.23317	4.01315	4.16281	0.00102073	0.0749448
ENSG00000212760	6	6.12745	5.86106	6.14288	0.00155835	0.0126181
ENSG00000168661	6	6.27561	6.04188	6.27599	0.00164096	0.0227759
ENSG00000167046	6	6.18809	5.88792	6.18737	0.00178361	0.0156398
ENSG00000182648	6	7.83381	7.60914	7.78834	0.00183371	0.0561645
ENSG00000203809	6	6.95568	7.16918	6.89533	0.00194846	0.00393427
ENSG00000121406	6	6.83751	6.66751	6.85299	0.00200341	0.00945079
ENSG00000170956	6	6.33144	6.1193	6.31332	0.00209206	0.0420134
ENSG00000160932	6	8.4936	8.73583	8.35341	0.00212845	0.000416164
ENSG00000196758	6	4.83793	4.61481	4.83628	0.0022601	0.0336479
ENSG00000186474	6	5.29251	5.09847	5.3119	0.00238538	0.0121694
ENSG00000125514	6	5.53335	5.24481	5.58203	0.00245084	0.00967859
ENSG00000203688	6	5.63357	5.34153	5.71258	0.00307648	0.00919839
ENSG00000184274	6	6.01171	5.79408	6.02686	0.00326891	0.0236
ENSG00000122718	6	5.89252	5.64924	5.89792	0.00329167	0.0274818
ENSG00000131015	6	6.23685	6.02661	6.22158	0.00367391	0.0641904
ENSG00000188581	6	6.14259	5.95357	6.13744	0.00385525	0.0411169
ENSG00000215289	6	6.88502	6.62461	6.8499	0.00405426	0.05192
ENSG00000205959	6	5.81674	5.58491	5.79129	0.00430327	0.0506949
ENSG00000171987	6	4.3748	4.17713	4.36112	0.00446315	0.0398469
ENSG00000204414	6	6.23462	6.04132	6.25031	0.00454064	0.0211557
ENSG00000196747	6	10.3811	10.9263	10.5697	0.00464311	0.172031
ENSG00000213016	6	5.36807	5.15176	5.35406	0.0049314	0.0592011
ENSG00000215866	6	6.45729	6.31541	6.47433	0.0052331	0.0271834
ENSG00000173335	6	4.2126	3.9942	4.24586	0.00532712	0.0114849
ENSG00000198864	6	6.26888	6.1081	6.25922	0.00561456	0.0520972
ENSG00000196318	6	7.59696	7.34969	7.51614	0.00573967	0.172526
ENSG00000196094	6	9.68073	9.36133	9.61234	0.00614968	0.0878353
ENSG00000203722	6	6.18226	6.02897	6.20309	0.00623097	0.0345093
ENSG00000167459	6	5.33194	5.14239	5.30254	0.00644711	0.100377
ENSG00000186462	6	8.04658	8.40352	7.9966	0.00666573	0.0258213
ENSG00000181877	6	6.35311	6.16173	6.39167	0.00689047	0.0224351
ENSG00000178928	6	5.62655	5.41357	5.61251	0.00717388	0.0518093
ENSG00000197472	6	5.43299	5.26846	5.44605	0.00764074	0.0422994
ENSG00000206123	6	7.97843	8.17749	8.00252	0.00778813	0.111822
ENSG00000204480	6	4.93259	4.67214	4.9847	0.00811642	0.0120674
ENSG00000104848	6	5.42412	5.18751	5.39447	0.00829895	0.110301
ENSG00000197800	6	7.25648	7.11701	7.26042	0.00836042	0.0465373
ENSG00000177202	6	5.23978	5.04185	5.23423	0.00840955	0.06678
ENSG00000204544	6	5.96746	5.78074	5.99748	0.00871313	0.0306778
ENSG00000213166	6	5.27328	5.07366	5.25379	0.0091406	0.0798565
ENSG00000214356	6	5.47307	5.25823	5.48747	0.00915653	0.0449846
ENSG00000186788	6	4.24671	4.05067	4.226	0.0100515	0.0745492
ENSG00000126895	6	5.69271	5.50141	5.70299	0.0104634	0.0508802
ENSG00000204616	6	5.00209	4.79629	5.02628	0.0107233	0.0413326
ENSG00000102076	6	5.07224	4.82975	5.10414	0.0107795	0.0284678
ENSG00000204362	6	6.14325	5.97001	6.15486	0.0109972	0.0448151
ENSG00000205445	6	6.48239	6.24634	6.46913	0.0114138	0.0959696
ENSG00000179028	6	5.12985	5.38876	5.04977	0.011494	0.0212009
ENSG00000167236	6	4.57319	4.38454	4.5716	0.0115122	0.0438023
ENSG00000213861	6	5.50312	5.27268	5.48495	0.0119672	0.068219
ENSG00000196936	6	4.91956	5.37268	5.00024	0.0123136	0.149431
ENSG00000188660	6	5.5117	5.3006	5.51193	0.0123307	0.0738782
ENSG00000212780	6	4.24234	3.90844	4.18646	0.0131436	0.1674
ENSG00000179452	6	4.49954	4.27479	4.48248	0.0139268	0.072256
ENSG00000110665	6	6.26217	6.06673	6.21514	0.0143437	0.160534
ENSG00000179219	6	5.65902	5.44903	5.60845	0.0146478	0.186938
ENSG00000124529	6	7.93728	8.27288	8.12756	0.0149443	0.468208
ENSG00000137080	6	3.57606	3.42085	3.57325	0.0156501	0.0713646
ENSG00000164508	6	5.54265	5.27641	5.58839	0.0164779	0.0422871
ENSG00000150165	6	5.24265	5.06536	5.23251	0.0165691	0.107441
ENSG00000197153	6	7.54586	8.15163	7.79836	0.0166342	0.318507
ENSG00000179300	6	4.12428	3.9292	4.09934	0.0168471	0.0984867
ENSG00000212935	6	6.89747	6.6863	6.884	0.0170734	0.111872
ENSG00000197084	6	7.0206	6.86939	6.98213	0.0176676	0.187511
ENSG00000197454	6	3.79361	4.13617	3.7424	0.0177681	0.0449136
ENSG00000181374	6	4.90225	4.7199	4.89238	0.0180184	0.0839832
ENSG00000204478	6	5.43487	5.23369	5.4395	0.0190151	0.083026
ENSG00000205913	6	5.612	5.43546	5.6012	0.0201473	0.102725
ENSG00000206181	6	4.57804	4.39417	4.54363	0.0202185	0.196252
ENSG00000140104	6	5.87509	5.99416	5.86568	0.0221281	0.0545515
ENSG00000214042	6	2.64071	2.50722	2.61026	0.0222289	0.176393
ENSG00000212743	6	3.69171	4.09543	3.80071	0.0232649	0.218199
ENSG00000167653	6	6.24643	6.07421	6.27416	0.023373	0.0438579
ENSG00000071677	6	7.37898	7.20899	7.39873	0.0234698	0.0588816
ENSG00000204001	6	6.3871	6.20684	6.37258	0.0235334	0.131647
ENSG00000189023	6	4.39143	4.19087	4.35546	0.0245075	0.147878
ENSG00000124635	6	7.04194	7.65974	7.23091	0.024768	0.270212
ENSG00000142515	6	5.63103	5.48121	5.61279	0.0261561	0.156147
ENSG00000189348	6	5.27603	5.02032	5.24738	0.0270205	0.16084
ENSG00000204603	6	5.43451	5.30003	5.44877	0.0275597	0.0922357
ENSG00000196326	6	4.55033	4.37421	4.52555	0.0278203	0.185723
ENSG00000180305	6	4.54313	4.35797	4.50445	0.0281068	0.20157
ENSG00000205015	6	7.23015	7.02768	7.22955	0.0285839	0.120028
ENSG00000204732	6	4.67095	4.51833	4.64354	0.0287404	0.170903
ENSG00000213897	6	6.53692	6.36587	6.53037	0.0298575	0.137883
ENSG00000100342	6	4.89859	4.76104	4.87916	0.0316492	0.170911
ENSG00000196866	6	7.32673	7.77745	7.57843	0.0326929	0.499159
ENSG00000203864	6	4.28135	4.08462	4.25498	0.0329806	0.188172
ENSG00000163283	6	6.10059	5.9408	6.12799	0.0333777	0.0724596
ENSG00000205857	6	3.95817	3.76972	3.94551	0.0344247	0.146428
ENSG00000185448	6	5.21146	5.02142	5.23081	0.0349408	0.089801
ENSG00000203404	6	5.22322	4.99106	5.276	0.0353532	0.0495415
ENSG00000149443	6	4.60436	4.42715	4.57343	0.0355856	0.212023
ENSG00000124157	6	3.56545	3.40013	3.57616	0.0360277	0.0777046
ENSG00000183359	6	4.54156	4.31758	4.51764	0.0382842	0.136161
ENSG00000214105	6	7.34205	7.18931	7.33948	0.0408368	0.137818
ENSG00000133169	6	11.003	11.1605	10.9688	0.041666	0.054433
ENSG00000215545	6	3.26526	2.94459	3.15558	0.042027	0.277561
ENSG00000196787	6	6.63872	6.95093	6.82835	0.043237	0.559828
ENSG00000167159	6	7.56996	7.43875	7.54726	0.0448104	0.232453
ENSG00000187012	6	5.38277	5.22845	5.39292	0.0448612	0.0848649
ENSG00000183686	6	5.6524	5.51576	5.64731	0.046422	0.149622
ENSG00000215344	6	2.82386	2.59737	2.66186	0.047008	0.64361
ENSG00000203987	6	6.06981	5.92111	6.03787	0.0474833	0.271489
ENSG00000136943	6	5.16382	5.0128	5.05641	0.0477023	0.668478
ENSG00000155918	6	6.19454	6.05776	6.19829	0.0497228	0.184096
ENSG00000205923	6	6.06144	5.89076	6.07164	0.0497796	0.127803
ENSG00000204644	6	5.26169	5.1163	5.32241	0.0499821	0.0320743
ENSG00000211505	6	5.68377	5.42125	5.6747	0.0510782	0.153978
ENSG00000171102	6	5.61733	5.44614	5.61035	0.0513145	0.18934
ENSG00000214897	6	5.24092	5.05117	5.1858	0.0530084	0.3199
ENSG00000180846	6	5.92384	5.78042	5.92679	0.0544576	0.147958
ENSG00000130303	6	4.78519	4.91974	4.80889	0.0545194	0.215396
ENSG00000186312	6	6.84143	6.94517	6.8422	0.0555863	0.131038
ENSG00000116726	6	5.01201	4.87455	5.04299	0.0561485	0.0918074
ENSG00000215889	6	5.05262	4.88142	5.02296	0.0569136	0.211729
ENSG00000171124	6	5.62021	5.44084	5.62035	0.0570492	0.146684
ENSG00000174403	6	6.68824	6.53421	6.66546	0.0633476	0.254051
ENSG00000205325	6	5.18608	5.03271	5.16919	0.0636562	0.245201
ENSG00000212659	6	6.03803	5.90992	6.03929	0.0637836	0.17901
ENSG00000184856	6	2.67008	2.53624	2.73664	0.0645592	0.0400436
ENSG00000196331	6	6.27507	6.06478	6.35743	0.0654475	0.0686929
ENSG00000196779	6	4.26614	4.07236	4.33246	0.0658857	0.0588129
ENSG00000205680	6	6.13776	5.98351	6.10207	0.0670026	0.251988
ENSG00000148386	6	4.61781	4.45843	4.61887	0.0699566	0.178688
ENSG00000100298	6	4.58136	4.37745	4.52947	0.0734485	0.331505
ENSG00000212710	6	3.97223	3.69318	3.98124	0.0742682	0.158657
ENSG00000204464	6	4.47683	4.28068	4.50725	0.077503	0.1454
ENSG00000168274	6	10.9311	10.7233	10.9223	0.0777645	0.263642
ENSG00000147381	6	5.24764	5.09872	5.21255	0.081054	0.309426
ENSG00000188011	6	6.77076	6.9161	6.7468	0.0815756	0.165484
ENSG00000204481	6	4.04005	3.91643	4.04306	0.0839759	0.222188
ENSG00000205231	6	5.73314	5.55777	5.76817	0.0862108	0.130626
ENSG00000184925	6	5.87256	5.74995	5.85448	0.0864246	0.311396
ENSG00000196589	6	5.29743	5.14896	5.23536	0.0905807	0.493826
ENSG00000196748	6	5.9359	5.80656	5.93805	0.0908956	0.220343
ENSG00000141574	6	5.88346	6.04313	5.849	0.0930504	0.171175
ENSG00000187866	6	8.48247	8.5816	8.50973	0.0937282	0.360899
ENSG00000206090	6	4.18916	4.00004	4.24854	0.0941743	0.0916223
ENSG00000215527	6	6.86686	6.69924	6.8794	0.0996526	0.20365
ENSG00000180855	6	6.59425	6.43301	6.6349	0.100984	0.139355
ENSG00000165828	6	6.65976	6.51642	6.64632	0.110336	0.330251
ENSG00000177800	6	4.3378	4.06594	4.27778	0.111266	0.315179
ENSG00000177984	6	5.90817	5.77071	5.88748	0.112808	0.335887
ENSG00000203871	6	4.93176	4.82524	4.93211	0.116366	0.241064
ENSG00000123569	6	4.75728	4.62107	4.72604	0.122363	0.382736
ENSG00000183678	6	6.55676	6.43021	6.56374	0.122892	0.264756
ENSG00000185168	6	6.36246	6.24572	6.37716	0.125277	0.210357
ENSG00000126550	6	3.09557	2.97924	3.04401	0.129472	0.524524
ENSG00000198454	6	6.84493	6.71576	6.84816	0.136218	0.280052
ENSG00000172058	6	8.09286	8.19796	8.05823	0.138486	0.169359
ENSG00000178412	6	6.29676	6.16789	6.27715	0.146861	0.387049
ENSG00000212776	6	5.87269	5.68066	5.95909	0.148247	0.0988582
ENSG00000169059	6	5.51834	5.39259	5.47734	0.159052	0.505817
ENSG00000008517	6	5.9283	5.85196	5.92099	0.159212	0.303354
ENSG00000175548	6	7.65827	7.76755	7.70758	0.160049	0.614134
ENSG00000153468	6	5.25858	5.15371	5.23028	0.162287	0.493981
ENSG00000178457	6	3.06114	2.92304	3.07835	0.162792	0.230237
ENSG00000147877	6	3.41101	3.30819	3.36984	0.167285	0.596619
ENSG00000197919	6	3.89915	3.80285	3.9025	0.169631	0.275098
ENSG00000205653	6	5.20984	5.08631	5.25239	0.193629	0.189891
ENSG00000146521	6	4.79301	4.89359	4.8245	0.198211	0.520762
ENSG00000134588	6	3.11572	3.00195	3.06137	0.198437	0.602301
ENSG00000203774	6	5.12418	5.0087	5.07153	0.202203	0.641841
ENSG00000184601	6	6.91882	6.81969	6.91731	0.211923	0.397385
ENSG00000163923	6	6.29239	6.16959	6.34606	0.218935	0.22465
ENSG00000120242	6	3.74364	3.65149	3.7241	0.221394	0.481172
ENSG00000128623	6	7.55025	7.39655	7.56457	0.225365	0.338664
ENSG00000186235	6	6.75218	6.6451	6.71672	0.23023	0.573609
ENSG00000185130	6	8.2092	8.41341	8.31266	0.233562	0.698623
ENSG00000180386	6	5.08284	4.93465	5.0593	0.273265	0.537308
ENSG00000206177	6	6.97348	6.8854	6.99449	0.277503	0.320191
ENSG00000171889	6	4.50864	4.42052	4.45156	0.282397	0.781302
ENSG00000214894	6	4.7717	4.66729	4.76668	0.295205	0.481605
ENSG00000152042	6	9.23078	9.28895	9.26818	0.300245	0.82102
ENSG00000118168	6	5.62869	5.49848	5.67424	0.304728	0.279538
ENSG00000187080	6	4.80443	4.9354	4.83951	0.306493	0.607678
ENSG00000205498	6	6.03407	5.9236	6.21686	0.308817	0.0363547
ENSG00000188747	6	7.49184	7.42015	7.49988	0.316077	0.432096
ENSG00000204250	6	4.04938	3.96833	4.02191	0.31801	0.663433
ENSG00000130598	6	6.21042	6.13483	6.17752	0.330669	0.698878
ENSG00000047634	6	5.65735	5.58067	5.58157	0.33297	0.993749
ENSG00000175550	6	9.07383	9.13994	9.03951	0.334489	0.290051
ENSG00000206114	6	3.53201	3.46751	3.48878	0.346791	0.797467
ENSG00000212747	6	8.75974	8.81788	8.69783	0.350756	0.179434
ENSG00000131152	6	6.49487	6.42542	6.46031	0.353407	0.767656
ENSG00000198384	6	4.28026	4.23969	4.23063	0.374717	0.895188
ENSG00000198354	6	7.94338	7.89222	7.8905	0.387832	0.983966
ENSG00000204065	6	6.34936	6.39593	6.36618	0.395648	0.684864
ENSG00000198414	6	4.85225	4.74271	4.84367	0.399163	0.6059
ENSG00000204011	6	4.80722	4.71125	4.81816	0.423267	0.532789
ENSG00000204387	6	7.25869	7.18596	7.09646	0.426008	0.503757
ENSG00000184348	6	8.50203	8.6756	8.63403	0.427194	0.899175
ENSG00000180016	6	3.66326	3.60161	3.63143	0.427957	0.773483
ENSG00000171234	6	3.2827	3.23324	3.27339	0.434882	0.628856
ENSG00000203900	6	6.0914	6.02844	6.07534	0.439456	0.696236
ENSG00000204513	6	4.27021	4.19141	4.27967	0.463832	0.563454
ENSG00000205036	6	5.24145	5.18778	5.20851	0.494343	0.848549
ENSG00000127081	6	7.89107	7.94539	7.94552	0.506212	0.999019
ENSG00000203947	6	3.79697	3.75038	3.71788	0.508133	0.690481
ENSG00000130600	6	6.91712	6.96296	6.93099	0.511244	0.746233
ENSG00000213185	6	6.04583	6.00801	6.05631	0.517231	0.571214
ENSG00000120664	6	3.89269	3.84304	3.8827	0.518796	0.705602
ENSG00000174586	6	7.32087	7.27448	7.27353	0.550474	0.993237
ENSG00000132274	6	4.96138	5.04437	5.29544	0.564226	0.181071
ENSG00000185057	6	6.24405	6.29666	6.24676	0.578764	0.720413
ENSG00000175873	6	6.01535	5.97824	6.05058	0.606743	0.455856
ENSG00000167685	6	7.21145	7.17718	7.18271	0.626233	0.956802
ENSG00000197865	6	5.23713	5.20549	5.21561	0.628022	0.917458
ENSG00000204989	6	3.96708	4.09521	3.94256	0.652881	0.663228
ENSG00000196605	6	5.13975	5.17856	5.08895	0.656483	0.431046
ENSG00000154251	6	4.67396	4.64183	4.65469	0.687082	0.905592
ENSG00000198128	6	5.13757	5.18214	5.16433	0.706696	0.911719
ENSG00000176120	6	6.26678	6.23692	6.18083	0.730565	0.626574
ENSG00000185295	6	6.60161	6.61811	6.54899	0.741456	0.294419
ENSG00000183250	6	6.01393	5.99131	5.9932	0.742013	0.985178
ENSG00000196273	6	5.15754	5.12146	5.08972	0.760517	0.847324
ENSG00000213441	6	3.22351	3.24412	3.18537	0.780913	0.527646
ENSG00000204754	6	6.22819	6.26427	6.17123	0.805443	0.601485
ENSG00000161643	6	6.18871	6.20668	6.1498	0.818146	0.559949
ENSG00000179304	6	8.13903	8.15652	8.07925	0.824692	0.4499
ENSG00000205636	6	2.83848	2.81682	2.69433	0.830641	0.251943
ENSG00000147885	6	3.35461	3.37272	3.28933	0.866096	0.526817
ENSG00000172062	6	7.38621	7.3729	7.41461	0.874002	0.718821
ENSG00000157873	6	6.59723	6.60592	6.67594	0.912256	0.466185
ENSG00000163734	6	5.83428	5.82786	5.8676	0.928676	0.688394
ENSG00000178021	6	6.17783	6.18087	6.19416	0.975027	0.920749
ENSG00000204600	6	6.02299	6.02511	6.02429	0.978081	0.992995
ENSG00000171115	6	5.45181	5.45262	5.4884	0.990627	0.688507
ENSG00000204071	6	7.71444	7.71484	7.66084	0.995466	0.575071
ENSG00000087250	5	7.94753	9.27306	8.01459	8.53806e-32	7.63103e-19
ENSG00000155984	5	8.48385	7.96009	8.46361	2.00322e-25	6.4784e-14
ENSG00000128739	5	8.40484	9.09221	8.43932	5.77338e-22	2.39419e-12
ENSG00000119922	5	4.5097	5.36238	4.53944	1.83645e-21	2.29705e-11
ENSG00000021300	5	7.17125	8.57882	7.41142	9.38993e-21	6.88013e-09
ENSG00000187607	5	6.96816	6.53506	6.95343	6.48734e-20	1.08973e-12
ENSG00000164616	5	4.63068	6.26844	4.60927	1.08297e-19	2.72504e-10
ENSG00000134291	5	8.31376	8.79025	8.35172	6.4109e-19	4.40303e-09
ENSG00000196812	5	6.39399	5.57732	6.3411	1.27424e-17	4.11809e-10
ENSG00000160961	5	7.44966	7.0585	7.44784	5.67304e-17	1.16048e-09
ENSG00000187792	5	7.36265	6.94687	7.40423	9.13362e-15	1.86482e-09
ENSG00000137033	5	4.32395	5.50148	4.54296	9.8456e-15	1.61279e-06
ENSG00000215312	5	5.64746	6.99834	5.99265	4.2203e-14	1.22145e-06
ENSG00000196150	5	8.42799	8.04706	8.47781	5.12438e-14	8.59676e-09
ENSG00000132016	5	7.38769	7.02606	7.39289	7.46254e-14	7.78745e-08
ENSG00000125846	5	6.62959	6.30415	6.61117	8.70752e-14	2.29144e-07
ENSG00000185201	5	6.45611	7.06364	6.45914	1.02789e-13	2.95183e-08
ENSG00000184809	5	4.67308	5.21994	4.68445	3.13953e-13	4.28325e-08
ENSG00000189149	5	5.1595	4.43473	5.18344	3.73301e-13	6.5483e-08
ENSG00000175787	5	6.15166	5.74073	6.11317	6.96835e-13	1.67872e-06
ENSG00000137185	5	7.50295	6.95376	7.58185	7.05656e-13	2.97748e-09
ENSG00000171129	5	6.80612	6.36697	6.76086	1.74543e-12	1.62953e-06
ENSG00000169981	5	6.94547	6.4207	6.96656	1.53724e-11	4.50732e-07
ENSG00000197657	5	5.20382	4.85043	5.26345	1.81516e-11	1.30409e-08
ENSG00000104888	5	8.61643	7.30947	8.29561	2.26014e-11	0.000474135
ENSG00000011422	5	6.434	6.00151	6.27771	2.27329e-11	0.000529414
ENSG00000187193	5	6.66613	7.01246	6.69975	2.65564e-11	2.07207e-06
ENSG00000179222	5	9.85014	10.2177	9.8362	2.92271e-11	1.37029e-07
ENSG00000205810	5	4.23916	4.82639	4.21558	3.54289e-11	1.59167e-06
ENSG00000133321	5	4.73274	5.31322	4.7631	8.01789e-11	6.85474e-07
ENSG00000108679	5	6.57412	7.19433	6.62939	9.12538e-11	1.60929e-05
ENSG00000197935	5	6.0759	5.7221	6.0712	9.70066e-11	2.37964e-07
ENSG00000182636	5	6.81814	7.23798	6.81822	1.75555e-10	3.30402e-06
ENSG00000185252	5	7.97445	7.68774	7.93543	2.02955e-10	5.36187e-05
ENSG00000167785	5	7.41826	7.09382	7.42991	2.24047e-10	2.6752e-07
ENSG00000092841	5	10.03	10.527	10.0369	2.31859e-10	6.94961e-06
ENSG00000205002	5	5.66892	6.35622	5.58143	3.27579e-10	2.14082e-08
ENSG00000135638	5	7.06214	6.45989	6.89206	3.42226e-10	0.000341066
ENSG00000171051	5	5.30038	5.93356	5.34685	7.19773e-10	1.67428e-05
ENSG00000203814	5	7.13837	7.83628	7.2346	1.3072e-09	8.03218e-05
ENSG00000147059	5	5.91195	5.60334	5.81358	1.41525e-09	0.000683105
ENSG00000196659	5	5.91924	6.35233	5.94453	1.48672e-09	4.276e-05
ENSG00000158691	5	6.42664	6.08151	6.48617	1.62836e-09	1.47442e-07
ENSG00000130643	5	8.31755	8.79408	8.29312	1.69261e-09	3.76743e-06
ENSG00000196793	5	6.57465	6.27566	6.49336	1.91937e-09	0.000644069
ENSG00000130803	5	7.54207	7.2754	7.57301	2.32173e-09	2.59527e-06
ENSG00000204272	5	8.166	8.65866	8.113	2.64641e-09	4.5553e-06
ENSG00000166681	5	9.09563	9.37916	9.0759	2.92779e-09	5.76947e-06
ENSG00000109193	5	3.54717	3.91442	3.511	5.2722e-09	2.33248e-06
ENSG00000205488	5	4.72651	5.55585	4.78669	5.37981e-09	0.000135287
ENSG00000188636	5	8.95261	8.66558	8.92178	6.07433e-09	0.000181157
ENSG00000184388	5	7.34305	7.89105	7.45254	7.87292e-09	0.000165606
ENSG00000126709	5	7.80311	8.44718	7.99066	1.17172e-08	0.000406977
ENSG00000184524	5	8.14864	8.51482	8.07687	2.57933e-08	3.63197e-06
ENSG00000159445	5	5.22221	5.64426	5.46883	4.17441e-08	0.0437153
ENSG00000198932	5	7.2766	7.76542	7.25314	4.21768e-08	1.72651e-05
ENSG00000179010	5	8.91807	9.25978	8.89596	4.92106e-08	4.48171e-06
ENSG00000165949	5	5.79823	6.21236	5.7328	4.92728e-08	6.92282e-06
ENSG00000142528	5	6.75882	6.52144	6.75908	5.11736e-08	7.32785e-05
ENSG00000186453	5	5.56358	5.25962	5.59295	9.75722e-08	1.54071e-05
ENSG00000139088	5	5.82433	6.973	5.59191	1.24657e-07	4.28651e-06
ENSG00000120784	5	7.81986	7.50628	7.83704	1.35224e-07	4.13738e-05
ENSG00000181908	5	6.39416	5.90813	6.10324	1.48055e-07	0.0335004
ENSG00000196152	5	7.24017	7.00454	7.23871	1.597e-07	0.000295115
ENSG00000189298	5	6.63414	6.34182	6.62995	1.64226e-07	0.000129384
ENSG00000147118	5	6.32287	6.13916	6.33356	1.78189e-07	6.71393e-05
ENSG00000197037	5	7.15699	6.9598	7.16268	1.88322e-07	7.50992e-05
ENSG00000151632	5	9.1134	8.63566	9.25384	2.41622e-07	8.39722e-07
ENSG00000176076	5	6.40404	6.81176	6.36532	2.50116e-07	3.62255e-05
ENSG00000161642	5	6.78332	7.11141	6.79016	2.75044e-07	0.00031075
ENSG00000184280	5	6.65845	6.28687	6.71604	2.85486e-07	1.747e-05
ENSG00000110925	5	9.93522	9.68935	9.93717	3.46971e-07	0.000254785
ENSG00000204685	5	6.37421	6.66071	6.353	3.52055e-07	3.81578e-05
ENSG00000182405	5	6.68363	6.41205	6.68146	3.58265e-07	0.00019122
ENSG00000129965	5	6.55479	6.89355	6.55856	3.94452e-07	0.000702724
ENSG00000167635	5	8.07468	7.69872	8.05133	4.11806e-07	0.000285046
ENSG00000197279	5	4.46056	4.75835	4.48095	4.32474e-07	0.000109275
ENSG00000198798	5	5.46349	5.11871	5.51567	4.49475e-07	2.79039e-06
ENSG00000182307	5	8.20856	8.45447	8.23532	4.62406e-07	0.000263158
ENSG00000204713	5	8.27773	8.01519	8.24445	5.48234e-07	0.000897728
ENSG00000187815	5	6.66505	6.31693	6.69352	6.06561e-07	1.75428e-05
ENSG00000177932	5	8.17712	7.9199	8.17389	7.89483e-07	0.000171249
ENSG00000132256	5	4.67654	4.96386	4.7225	1.09297e-06	0.0015485
ENSG00000056277	5	7.55411	7.25311	7.53424	1.2168e-06	0.000212581
ENSG00000196981	5	7.12177	6.78673	7.21826	1.40676e-06	3.17717e-05
ENSG00000107798	5	6.94964	7.35846	7.10203	1.52324e-06	0.0278211
ENSG00000158747	5	7.61508	7.97459	7.63988	1.90622e-06	0.000638688
ENSG00000197182	5	7.27121	6.93922	7.23641	2.28751e-06	0.00266691
ENSG00000214043	5	4.7198	4.31509	4.73243	2.74555e-06	0.0002385
ENSG00000081386	5	7.57587	7.30056	7.59553	4.40977e-06	0.000150727
ENSG00000198547	5	5.73895	5.42244	5.67123	4.6307e-06	0.00761086
ENSG00000083812	5	7.50609	7.26656	7.4988	5.12008e-06	0.000958475
ENSG00000196597	5	6.57515	6.28778	6.50585	5.66665e-06	0.00864108
ENSG00000197863	5	7.37185	7.04943	7.42744	6.08628e-06	2.37097e-05
ENSG00000167637	5	6.01915	5.71739	6.06878	6.54721e-06	5.07875e-05
ENSG00000198455	5	8.5761	8.39198	8.55246	7.45592e-06	0.00465829
ENSG00000136866	5	7.51118	7.09657	7.52466	7.54721e-06	0.000205261
ENSG00000163170	5	7.98496	8.2574	8.02051	7.77137e-06	0.00895706
ENSG00000136834	5	4.75056	4.45092	4.74041	8.1592e-06	0.000249777
ENSG00000147256	5	4.72971	5.23619	4.70405	8.33372e-06	0.00236112
ENSG00000085063	5	7.82082	8.07972	7.88081	1.09164e-05	0.0187212
ENSG00000111057	5	6.91881	7.27595	6.83076	1.15914e-05	0.000181476
ENSG00000187626	5	6.16117	5.96856	6.19443	1.33171e-05	0.000128412
ENSG00000166927	5	4.15551	4.46631	4.18237	1.33766e-05	0.0025342
ENSG00000173113	5	8.95623	9.29884	8.97013	1.35526e-05	0.00316443
ENSG00000145908	5	8.19569	7.71387	8.2136	1.36586e-05	0.0016427
ENSG00000116815	5	4.76425	5.12734	4.81653	1.36949e-05	0.00312017
ENSG00000198040	5	8.73149	8.4763	8.76995	1.39904e-05	7.29088e-05
ENSG00000134590	5	9.41736	9.65457	9.38105	1.39956e-05	0.000187707
ENSG00000196071	5	5.13394	5.72158	5.13047	1.45168e-05	0.00180229
ENSG00000143546	5	5.29556	5.75873	5.34549	1.49051e-05	0.00464255
ENSG00000186017	5	8.05814	7.7147	8.11031	1.51344e-05	0.000102457
ENSG00000187987	5	6.03482	5.79116	6.09397	1.61244e-05	0.000101562
ENSG00000196741	5	7.45926	7.03665	7.46209	1.70919e-05	0.00197283
ENSG00000180812	5	6.7116	6.98614	6.88835	1.8172e-05	0.176114
ENSG00000111729	5	4.62186	4.39219	4.60702	1.93271e-05	0.0039143
ENSG00000205438	5	5.16819	4.83907	5.15968	1.97065e-05	0.00112493
ENSG00000189043	5	8.20495	8.59152	8.21534	2.02158e-05	0.00344259
ENSG00000059122	5	7.52839	7.34277	7.49281	2.09988e-05	0.0110844
ENSG00000180219	5	4.73593	4.36843	4.70629	2.26675e-05	0.00314398
ENSG00000105132	5	7.04299	6.83568	7.04369	2.52393e-05	0.00501881
ENSG00000168116	5	8.37609	7.88619	8.34162	2.6604e-05	0.0028733
ENSG00000166368	5	4.96248	5.40057	4.87294	2.7908e-05	0.00030721
ENSG00000182916	5	8.04934	8.42693	8.09259	2.88492e-05	0.0119273
ENSG00000125962	5	6.19564	6.01883	6.1752	3.10504e-05	0.00474417
ENSG00000184032	5	5.7456	5.38483	5.74957	3.28313e-05	0.00250894
ENSG00000163568	5	5.6666	5.12475	5.62356	4.06106e-05	0.00864485
ENSG00000131050	5	4.85855	4.5755	4.82722	4.19383e-05	0.00901807
ENSG00000113396	5	4.50079	4.84445	4.55839	4.70572e-05	0.0292541
ENSG00000165943	5	8.78412	9.06519	8.838	5.15029e-05	0.0201757
ENSG00000144161	5	6.83595	6.55214	6.82624	5.34045e-05	0.00552475
ENSG00000111981	5	7.07055	6.66722	7.05197	5.60352e-05	0.0121483
ENSG00000145808	5	5.12482	5.52912	5.16298	5.63944e-05	0.0227172
ENSG00000184619	5	7.96813	7.78321	8.0044	5.64872e-05	0.000533609
ENSG00000172465	5	8.15793	7.92607	8.04486	5.99801e-05	0.106707
[truncated: 16,931 more rows]
