# Supplementary material for: Accelerated Recruitment of New Brain Development Genes into the Human Genome
Source: PLoS Biol. 2011 Oct 18;9(10):e1001179. doi: 10.1371/journal.pbio.1001179 (PMC3196496; doi:10.1371/journal.pbio.1001179)
Supplement: Table S9 — Statistics of young and old genes with differential expression between different developmental stages of the human temporal lobe. This table is similar to the top panel of Table S1 except that only genes retained in the latest Ensembl v62 were used. (XLS) [file pbio.1001179.s016.xls]

## Sheet: Table S9
Table S9
	Temporal lobe
	Young	Old
Early<Late	81	7327
Early>Late	177	4708
Fisher's Exact Test P	2.2x10-16
